# Supplementary material for: Technical Note: The MAPt/Pht/∞ Queueing System and Multiclass [MAPt/Pht/∞]K Queueing Network
Source: Atypon-hosted journal article supplement (doi:10.1287/ijoc.2016.0736), 2017-04-25
Supplement: ijoc.2016.0736-sm.zip [file MAPPhInf_ElectronicCompanion_revisedFeb2017.pdf › MAPPhInf_ElectronicCompanion_revisedFeb2017.pdf]

Authors are encouraged to submit new papers to INFORMS journals by means of a style file template, which includes the journal title. However, use of a template does not certify that the paper has been accepted for publication in the named journal. INFORMS journal templates are for the exclusive purpose of submitting to an INFORMS journal and should not be used to distribute the papers in print or online or to submit the papers to another publication.

# Electronic Companion to Technical Note: The $MAP_t/Ph_t/\infty$ Queueing System and Multiclass $[MAP_t/Ph_t/\infty]^K$ Queueing Network

Ira Gerhardt

Department of Mathematics, Manhattan College, ira.gerhardt@manhattan.edu,

Barry L. Nelson

Department of Industrial Engineering & Management Sciences, Northwestern University, nelsonb@northwestern.edu,

Michael R. Taaffe

Grado Department of Industrial and Systems Engineering, Virginia Tech, taaffe@vt.edu.

In this paper we demonstrate how a key adjustment to known numerically exact methods for evaluating time-dependent moments of the number of entities in the  $Ph_t/Ph_t/\infty$  queueing system and  $[Ph_t/Ph_t/\infty]^K$  queueing network may be implemented to capture the effect of autocorrelation that may be present in arrivals to the more general  $MAP_t/Ph_t/\infty$  queueing system and multiclass  $[MAP_t/Ph_t/\infty]^K$  queueing network. The  $MAP_t$  is more general than the  $Ph_t$  arrival process in that it allows for stationary *non-renewal* point processes, as well as the time-dependent generalization of non-renewal point processes. Modeling real-world systems with bursty arrival processes such as those in telecommunications and transportation, for example, necessitate the use of non-renewal processes. Finally, we show that the covariance of the number of entities at different nodes and times may be described by a single closed differential equation.

*Key words:* queues; queueing; algorithms; phase-type distribution; nonstationary processes; infinite server; MAPs; queueing networks; time-dependent; transient

*History:* Submitted 1 Apr 2016; Revised 1 Sep 2016; Accepted 13 Sep 2016

---

## Translating to and from Lucantoni MAP Notation

We can construct the Lucantoni representation directly from our representation  $(\mathbf{A}, \boldsymbol{\lambda})$ , namely

$$\mathbf{D}_0 = \boldsymbol{\Lambda}(\mathbf{A}_1 - \mathbf{I}),$$

where  $\mathbf{\Lambda}$  is a diagonal matrix with nonzero elements  $\lambda_j$ , for  $j = 1, 2, \dots, m_A$ , and  $\mathbf{I}$  is the identity matrix, while

$$(\mathbf{D}_1)_{jh} = \lambda_j \left( \sum_{k=1}^{v_A} a_{j,m_A+k} \alpha_{kh} \right),$$

for  $j, h = 1, 2, \dots, m_A$ .

Notice that the reverse construction (to ours from Lucantoni) may be performed by assigning to each transient phase a unique absorbing phase to which to transition in the event of an arrival (i.e., setting  $v_A = m_A$ ). Given Lucantoni matrices  $(\mathbf{D}_0, \mathbf{D}_1)$  we can specify our representation  $(\mathbf{A}, \mathbf{\Lambda})$  by setting

$$\begin{aligned} \lambda_j &= -(\mathbf{D}_0)_{jj} \\ a_{jh} &= \begin{cases} 0, & \text{if } h = j, \\ ((\mathbf{D}_0)_{jh})/\lambda_j & \text{otherwise,} \end{cases} \\ a_{j,m_A+h} &= \begin{cases} 1 - \sum_{r=1}^{m_A} a_{jr}, & \text{if } h = j, \\ 0, & \text{otherwise,} \end{cases} \\ \alpha_{jh} &= ((\mathbf{D}_1)_{jh})/(\lambda_j a_{j,m_A+j}). \end{aligned}$$

for  $j, h = 1, 2, \dots, m_A$ . Notice that this defines  $\mathbf{A}_2$  as a diagonal matrix.

## The Closed System of MDEs for the $MAP_t/Ph_t/\infty$ Queueing System

**THEOREM 2.** *For the  $MAP_t/Ph_t/\infty$  with  $t \geq s$ ,  $s \geq 0$ , and  $i$  and  $j = 1, 2, \dots, m_B$ ,*

$$C_{i,j}(s, t)' \equiv -\mu_j(t)C_{i,j}(s, t) + \sum_{r=1}^{m_B} \mu_r(t)b_{r,j}(t)C_{i,j}(s, t) \quad (1)$$

where  $b_{r,j}(t)$  is the Markov routing probability for entities proceeding to node  $j$  after having finished their service at node  $r$  at time  $t$ , for  $r$  and  $j = 1, 2, \dots, m_B$ , and  $t \geq s$ .

**Proof:**

$$C_{i,j}(s, t)' \equiv E_{ij}(s, t)' - (E_i(s)E_j(t))',$$

where  $E_{ij}(s, t)' \equiv E' [N_i(s)N_j(t)]$ . Now using the partial marginal Kolmogorov equations defined in the earlier text we have

$$\begin{aligned}
 E_{ij}(s, t)' &= \sum_{n_i=0}^{\infty} \sum_{n_j=0}^{\infty} n_i n_j \frac{\partial}{\partial t} P(N_i(s) = n_i, N_j(t) = n_j) \\
 &= - \sum_{n_i=0}^{\infty} \sum_{n_j=0}^{\infty} n_i n_j \beta_j(t) \sum_{h=1}^{m_A} \lambda_h(t) \sum_{r=1}^{v_A} a_{h, m_A+r}(t) P(N_i(s) = n_i, N_j(t) = n_j, A(t) = h) \\
 &\quad - \sum_{n_i=0}^{\infty} \sum_{n_j=0}^{\infty} n_i n_j [1 - b_{jj}(t)] \mu_j(t) n_j P(N_i(s) = n_i, N_j(t) = n_j) \\
 &\quad - \sum_{n_i=0}^{\infty} \sum_{n_j=0}^{\infty} n_i n_j \sum_{\substack{r=1 \\ r \neq j}}^{m_B} \mu_r(t) b_{rj}(t) \sum_{n_r=0}^{\infty} n_r P(N_i(s) = n_i, N_j(t) = n_j, N_r(t) = n_r) \\
 &\quad + \sum_{n_i=0}^{\infty} \sum_{n_j=0}^{\infty} n_i n_j \beta_j(t) \sum_{h=1}^{m_A} \lambda_h(t) \sum_{r=1}^{v_A} a_{h, m_A+r}(t) P(N_i(s) = n_i, N_j(t) = n_j - 1, A(t) = h) \\
 &\quad + \sum_{n_i=0}^{\infty} \sum_{n_j=0}^{\infty} n_i n_j \mu_j(t) [1 - b_{jj}(t)] (n_j + 1) P(N_i(s) = n_i, N_j(t) = n_j + 1) \\
 &\quad + \sum_{n_i=0}^{\infty} \sum_{n_j=0}^{\infty} n_i n_j \sum_{\substack{r=1 \\ r \neq j}}^{m_B} \mu_r(t) b_{rj}(t) \sum_{n_r=0}^{\infty} n_r P(N_i(s) = n_i, N_j(t) = n_j - 1, N_r(t) = n_r) \\
 &= - \beta_j(t) \sum_{h=1}^{m_A} \lambda_h(t) \sum_{r=1}^{v_A} a_{h, m_A+r}(t) E_{ij, h}(s, t) - \mu_j(t) [1 - b_{jj}(t)] E_{ijj}(s, t, t) \\
 &\quad - \sum_{\substack{r=1 \\ r \neq j}}^{m_B} \mu_r(t) b_{rj}(t) E_{irj}(s, t, t) + \beta_j(t) \sum_{h=1}^{m_A} \lambda_h(t) \sum_{r=1}^{v_A} a_{h, m_A+r}(t) E_{i(j+1), h}(s, t) \\
 &\quad + \mu_j(t) [1 - b_{jj}(t)] E_{ij(j-1)}(s, t, t) + \sum_{\substack{r=1 \\ r \neq j}}^{m_B} \mu_r(t) b_{rj}(t) E_{ir(j+1)}(s, t, t) \\
 &= \beta_j(t) \sum_{h=1}^{m_A} \lambda_h(t) \sum_{r=1}^{v_A} a_{h, m_A+r}(t) E_{i, h}(s, t) + \sum_{\substack{r=1 \\ r \neq j}}^{m_B} \mu_r(t) b_{rj}(t) E_{ir}(s, t) \\
 &\quad + \mu_j(t) [1 - b_{jj}(t)] (E_{ijj}(s, t, t) - E_{ij}(s, t)) - \mu_j(t) [1 - b_{jj}(t)] E_{ijj}(s, t, t)
 \end{aligned}$$

$$= \beta_j(t) \sum_{h=1}^{m_A} \lambda_h(t) \sum_{r=1}^{v_A} a_{h,m_A+r}(t) E_{i,h}(s, t) + \sum_{r=1}^{m_B} \mu_r(t) b_{rj}(t) E_{ir}(s, t) \mu_j(t) E_{ij}(s, t)$$

And using the fact that  $E_{i,h}(s, t) = P(t; \cdot, \ell) E_i(s)$  and the result for  $E_j(t)'$  from Nelson and Taaffe (2004), we have

$$\begin{aligned} \frac{\partial}{\partial t} (E_i(s) E_j(t)) &= E_i(s) \left( \frac{d}{dt} E_j(t) \right) \\ &= E_i(s) \beta_j(t) \sum_{\ell=1}^{m_A} \sum_{r=1}^{v_A} a_{h,m_A+r}(t) \lambda_\ell(t) P(t; \cdot, \ell) + E_i(s) \left( \sum_{\ell=1}^{m_B} b_{\ell j}(t) \mu_\ell(t) E_\ell(t) - \mu_\ell(t) E_j(t) \right) \end{aligned}$$

So combining these terms

$$\begin{aligned} C_{i,j}(s, t)' &= -\mu_j(t) E_{ij}(s, t) + \sum_{r=1}^{m_B} \mu_r(t) b_{rj}(t) E_{ir}(s, t) - E_i(s) \sum_{r=1}^{m_B} \mu_r(t) b_{rj}(t) E_r(t) + \mu_j(t) E_i(s) E_j(t) \\ &= -\mu_j(t) C_{i,j}(s, t) + \sum_{r=1}^{m_B} \mu_r(t) b_{rj}(t) C_{i,j}(s, t) \end{aligned}$$

□

Notice that the functional form of this result is 1) the same as the Massey and Whitt Whitt and Massey (1993) result for the  $[M_t/M_t/\infty]^K$  and  $M_t/G_t/\infty$  system, and 2) *independent* of the arrival process. The latter point is intuitive since entities arriving to the system after time  $s$  do not interact/interfere with entities already present in the system by time  $s$ .

**THEOREM 3.** *The  $MAP_t/Ph_t/\infty$  arrival-process state-probability differential equations (ADEs) are:*

$$P(t; \cdot, k)' = \sum_{\ell=1}^{m_A} \lambda_\ell(t) P(t; \cdot, \ell) \left( \sum_{h=1}^{v_A} a_{\ell,m_A+h}(t) \alpha_{h,k}(t) \right) + \sum_{\ell=1}^{m_A} a_{\ell k}(t) \lambda_\ell(t) P(t; \cdot, \ell) - \lambda_k(t) P(t; \cdot, k)$$

for  $k = 1, 2, \dots, m_A$ .

**Proof:** While we can show this result by straightforward and tedious algebraic manipulation of the expression

$$P(t; \cdot, k)' \equiv \sum_{n_1=0}^{\infty} \sum_{n_2=0}^{\infty} \cdots \sum_{n_j=0}^{\infty} \cdots \sum_{n_{m_B}=0}^{\infty} P(t; n_1, n_2, \dots, n_{m_B}, k)',$$

we also note that the arrival process is independent of the service process and therefore we can formulate the KFEs associated with this simple time-dependent Markov arrival process directly.  $\square$

The *marginal first-moment differential equations* (MMDEs) are shown below and we observe that they are *not* closed. Let  $E_j(t) \equiv E[N_j(t)]$ .

**THEOREM 4.** *The  $MAP_t/Ph_t/\infty$  marginal first-moment differential equations (MMDEs) are:*

$$\begin{aligned} E_j(t)' \equiv \frac{d}{dt} E_j(t) = & \beta_j(t) \sum_{\ell=1}^{m_A} \lambda_{\ell}(t) \left( \sum_{k=1}^{v_A} a_{\ell, m_A+k}(t) \right) P(t; \cdot, \ell) \\ & + \sum_{\substack{\ell=1 \\ \ell \neq j}}^{m_B} b_{\ell j}(t) \mu_{\ell}(t) E_{\ell}(t) - [1 - b_{jj}(t)] E_j(t) \end{aligned}$$

for  $j = 1, 2, \dots, m_B$ .

**THEOREM 5.** *The  $MAP_t/Ph_t/\infty$   $p^{th}$ -partial-moment differential equations ( $p^{th}$  PMDEs):*

$$\begin{aligned} \frac{d}{dt} E_{j,k}^p(t) = & - \lambda_k(t) E_{j,k}^p(t) + [1 - b_{jj}(t)] \mu_j(t) \sum_{q=0}^{p-1} \binom{p}{q} E_{j,k}^{q+1}(t) (-1)^{p-q} \\ & + \sum_{\ell=1}^{m_A} \left( \sum_{h=1}^{v_A} a_{\ell, m_A+h}(t) \alpha_{h,k}(t) \right) \lambda_{\ell}(t) E_{j,\ell}^p(t) \\ & + \beta_j(t) \sum_{\ell=1}^{m_A} \left( \sum_{h=1}^{v_A} a_{\ell, m_A+h}(t) \alpha_{h,k}(t) \right) \lambda_{\ell}(t) \sum_{q=0}^{p-1} \binom{p}{q} E_{j,\ell}^q(t) \\ & + \sum_{\ell=1}^{m_A} \lambda_{\ell}(t) a_{\ell k}(t) E_{j,\ell}^p(t) + \sum_{\substack{\ell=1 \\ \ell \neq j}}^{m_B} \mu_{\ell}(t) b_{\ell j}(t) \sum_{q=0}^{p-1} \binom{p}{q} E_{j\ell,k}^q(t) \end{aligned}$$

for  $i = 1, 2, \dots, m_A$ ,  $j = 1, 2, \dots, m_B$ , and  $p = 0, 1, 2, \dots$

**Proof:**

$$\begin{aligned}
\frac{d}{dt} E_{j,k}^p(t) &\equiv \sum_{n_1=0}^{\infty} \sum_{n_2=0}^{\infty} \cdots \sum_{n_j=0}^{\infty} \cdots \sum_{n_{m_B}=0}^{\infty} n_j^p P(t; n_1, n_2, \dots, n_{m_B}, k)' \\
&= \sum_{n_1=0}^{\infty} \sum_{n_2=0}^{\infty} \cdots \sum_{n_j=0}^{\infty} \cdots \sum_{n_{m_B}=0}^{\infty} n_j^p \times \\
&\quad \left\{ - [1 - a_{kk}(t)] \lambda_k(t) P(t; n_1, n_2, \dots, n_{m_B}, k) \right. \\
&\quad - \sum_{\ell=1}^{m_B} n_{\ell} \mu_{\ell}(t) [1 - b_{\ell\ell}(t)] P(t; n_1, n_2, \dots, n_{m_B}, k) \\
&\quad + \sum_{\ell=1}^{m_A} \left( \sum_{h=1}^{v_A} a_{\ell, m_A+h}(t) \alpha_{h,k}(t) \right) \lambda_{\ell}(t) \sum_{h=1}^{m_B} I_{[n_h > 0]} \beta_h(t) P(t; n_1, \dots, n_h - 1, \dots, n_{m_B}, \ell) \\
&\quad + \sum_{\substack{\ell=1 \\ \ell \neq k \\ m_B}}^{m_A} a_{\ell k}(t) \lambda_{\ell}(t) P(t; n_1, n_2, \dots, n_{m_B}, \ell) \\
&\quad + \sum_{\substack{\ell=1 \\ m_B}} b_{\ell, m_B+1}(t) [n_{\ell} + 1] \mu_{\ell}(t) P(t; n_1, \dots, n_{\ell} + 1, \dots, n_{m_B}, k) \\
&\quad \left. + \sum_{\ell=1} I_{[n_{\ell} > 0]} \sum_{\substack{h=1 \\ h \neq \ell}}^{m_B} b_{h\ell}(t) [n_h + 1] \mu_h(t) P(t; n_1, \dots, n_{\ell} - 1, \dots, n_h + 1, \dots, n_{m_B}, k) \right\} \\
&= -[1 - a_{kk}(t)] \lambda_k(t) E_{j,k}^p(t) - \sum_{\substack{\ell=1 \\ \ell \neq j}}^{m_B} \mu_{\ell}(t) [1 - b_{\ell\ell}(t)] E_{j\ell,k}^p(t) - \mu_j(t) [1 - b_{jj}(t)] E_{j,k}^{p+1}(t) \\
&\quad + \sum_{\ell=1}^{m_A} \left( \sum_{h=1}^{v_A} a_{\ell, m_A+h}(t) \alpha_{h,k}(t) \right) \lambda_{\ell}(t) \left\{ \sum_{\substack{h=1 \\ h \neq j}}^{m_B} \beta_h(t) E_{j,\ell}^p(t) + \beta_j(t) \sum_{n_j=0}^{\infty} [n_j + 1]^p P(t; n_j, \ell) \right\} \\
&\quad + \sum_{\substack{\ell=1 \\ \ell \neq k}}^{m_A} a_{\ell k}(t) \lambda_{\ell}(t) E_{j,\ell}^p(t) + \sum_{\substack{\ell=1 \\ \ell \neq j}}^{m_B} b_{\ell, m_B+1}(t) \mu_{\ell}(t) \sum_{n_{\ell}=0}^{\infty} \sum_{n_j=0}^{\infty} n_j^p [n_{\ell} + 1] P(t; n_{\ell+1}, n_j, k) \\
&\quad + b_{j, m_B+1}(t) \mu_j(t) \sum_{n_j=0}^{\infty} n_j^p [n_j + 1] P(t; n_j + 1, k)
\end{aligned}$$

$$\begin{aligned}
 & + \sum_{\substack{\ell=1 \\ \ell \neq j}}^{m_B} \left\{ \sum_{\substack{h=1 \\ h \neq \ell \\ h \neq j}}^{m_B} b_{h\ell}(t) \mu_h(t) \sum_{n_\ell=1}^{\infty} \sum_{n_h=0}^{\infty} \sum_{n_j=0}^{\infty} n_j^p [n_h + 1] P(t; n_\ell - 1, n_j, n_h + 1, k) \right. \\
 & \quad \left. + \mu_j(t) b_{j\ell}(t) \sum_{n_\ell=1}^{\infty} \sum_{n_j=0}^{\infty} n_j^p [n_j + 1] P(t; n_\ell - 1, n_j + 1, k) \right\} \\
 & + \sum_{\substack{h=1 \\ h \neq j}}^{m_B} b_{hj}(t) \mu_h(t) \sum_{n_h=0}^{\infty} \sum_{n_j=1}^{\infty} n_j^p [n_h + 1] P(t; n_j - 1, n_h + 1, k) \\
 = & -\lambda_k(t) E_{j,k}^p(t) - \sum_{\substack{\ell=1 \\ \ell \neq j}}^{m_B} \mu_\ell(t) [1 - b_{\ell\ell}(t)] E_{j\ell,k}^p(t) - \mu_j(t) [1 - b_{jj}(t)] E_{j,k}^{p+1}(t) \\
 & + \sum_{\ell=1}^{m_A} \left( \sum_{h=1}^{v_A} a_{\ell, m_A+h(t)} \alpha_{h,k}(t) \right) \lambda_\ell(t) \left\{ [1 - \beta_j(t)] E_{j,\ell}^p(t) + \beta_j(t) \sum_{q=0}^p \binom{p}{q} E_{j,\ell}^q(t) \right\} \\
 & + \sum_{\ell=1}^{m_A} a_{\ell k}(t) \lambda_\ell(t) E_{j,\ell}^p(t) + \sum_{\ell=1}^{m_B} b_{\ell, m_B+1}(t) \mu_\ell(t) \sum_{n_\ell=1}^{\infty} \sum_{n_j=0}^{\infty} n_j^p n_\ell P(t; n_\ell, n_j, k) \\
 & + b_{j, m_B+1}(t) \mu_j(t) \sum_{n_j=1}^{\infty} [n_j - 1]^p n_j P(t; n_j, k) \\
 & + \sum_{\substack{\ell=1 \\ \ell \neq j}}^{m_B} \sum_{\substack{h=1 \\ h \neq \ell \\ h \neq j}}^{m_B} b_{h\ell}(t) \mu_h(t) \sum_{n_\ell=0}^{\infty} \sum_{n_h=0}^{\infty} \sum_{n_j=0}^{\infty} n_j^p [n_h + 1] P(t; n_\ell, n_j, n_h + 1, k) \\
 & + \mu_j(t) \sum_{\substack{\ell=1 \\ \ell \neq j}}^{m_B} b_{j\ell}(t) \sum_{n_j=1}^{\infty} [n_j - 1]^p n_j \sum_{n_\ell=0}^{\infty} P(t; n_\ell, n_j, k) \\
 & + \sum_{\substack{h=1 \\ h \neq j}}^{m_B} b_{hj}(t) \mu_h(t) \sum_{n_h=0}^{\infty} \sum_{n_j=0}^{\infty} [n_j + 1]^p [n_h + 1] P(t; n_j, n_h + 1, k) \\
 = & -\lambda_k(t) E_{j,k}^p(t) - \sum_{\substack{\ell=1 \\ \ell \neq j}}^{m_B} \mu_\ell(t) [1 - b_{\ell\ell}(t)] E_{j\ell,k}^p(t) - \mu_j(t) [1 - b_{jj}(t)] E_{j,k}^{p+1}(t)
 \end{aligned}$$

$$\begin{aligned}
& + \beta_j(t) \sum_{\ell=1}^{m_A} \left( \sum_{h=1}^{v_A} a_{\ell, m_A+h}(t) \alpha_{h,k}(t) \right) \lambda_{\ell}(t) \sum_{q=0}^p \binom{p}{q} E_{j,\ell}^q(t) \\
& + (1 - \beta_j(t)) \sum_{\ell=1}^{m_A} \left( \sum_{h=1}^{v_A} a_{\ell, m_A+h}(t) \alpha_{h,k}(t) \right) \lambda_{\ell}(t) E_{j,\ell}^p(t) \\
& + \sum_{\ell=1}^{m_A} a_{\ell k}(t) \lambda_{\ell}(t) E_{j,\ell}^p(t) + \sum_{\substack{\ell=1 \\ \ell \neq j}}^{m_B} b_{\ell, m_B+1}(t) \mu_{\ell}(t) E_{j\ell,k}^p(t) \\
& + b_{j, m_B+1}(t) \mu_j(t) \sum_{q=0}^p \binom{p}{q} E_{j,k}^{q+1}(t) (-1)^{p-q} \\
& + \sum_{\substack{\ell=1 \\ \ell \neq j}}^{m_B} \sum_{\substack{h=1 \\ h \neq \ell \\ h \neq j}}^{m_B} b_{h\ell}(t) \mu_h(t) \sum_{n_{\ell}=0}^{\infty} \sum_{n_h=1}^{\infty} \sum_{n_j=0}^{\infty} n_j^p n_h P(t; n_{\ell}, n_j, n_h, k) \\
& + \mu_j(t) \sum_{\substack{\ell=1 \\ \ell \neq j}}^{m_B} b_{j\ell}(t) \sum_{n_j=1}^{\infty} [n_j - 1]^p n_j P(t; n_j, k) \\
& + \sum_{\substack{h=1 \\ h \neq j}}^{m_B} b_{hj}(t) \mu_h(t) \sum_{n_h=1}^{\infty} \sum_{n_j=0}^{\infty} [n_j + 1]^p n_h P(t; n_j, n_h, k) \\
& = -\lambda_k(t) E_{j,k}^p(t) - \sum_{\substack{\ell=1 \\ \ell \neq j}}^{m_B} \mu_{\ell}(t) [1 - b_{\ell\ell}(t)] E_{j\ell,k}^p(t) - \mu_j(t) [1 - b_{jj}(t)] E_{j,k}^{p+1}(t) \\
& + \beta_j(t) \sum_{\ell=1}^{m_A} \left( \sum_{h=1}^{v_A} a_{\ell, m_A+h}(t) \alpha_{h,k}(t) \right) \lambda_{\ell}(t) \sum_{q=0}^{p-1} \binom{p}{q} E_{j,\ell}^q(t) \\
& + \sum_{\ell=1}^{m_A} \left( \sum_{h=1}^{v_A} a_{\ell, m_A+h}(t) \alpha_{h,k}(t) \right) \lambda_{\ell}(t) E_{j,\ell}^p(t) \\
& + \sum_{\ell=1}^{m_A} a_{\ell k}(t) \lambda_{\ell}(t) E_{j,\ell}^p(t) + \sum_{\substack{\ell=1 \\ \ell \neq j}}^{m_B} b_{\ell, m_B+1}(t) \mu_{\ell}(t) E_{j\ell,k}^p(t)
\end{aligned}$$



$$\begin{aligned}
 & + b_{j,m_B+1}(t) \mu_j(t) \sum_{q=0}^p \binom{p}{q} E_{j,k}^{q+1}(t) (-1)^{p-q} + \sum_{\substack{\ell=1 \\ \ell \neq j}}^{m_B} \sum_{\substack{h=1 \\ h \neq \ell \\ h \neq j}}^{m_B} b_{h\ell}(t) \mu_h(t) E_{jh,k}^p(t) \\
 & + \mu_j(t) \sum_{\substack{\ell=1 \\ \ell \neq j}}^{m_B} b_{j\ell}(t) \sum_{q=0}^p \binom{p}{q} E_{j,k}^{q+1}(t) (-1)^{p-q} + \sum_{\substack{h=1 \\ h \neq j}}^{m_B} b_{hj}(t) \mu_h(t) \sum_{q=0}^p \binom{p}{q} E_{jh,k}^q(t) \\
 = & -\lambda_k(t) E_{j,k}^p(t) - \sum_{\substack{\ell=1 \\ \ell \neq j}}^{m_B} \mu_\ell(t) [1 - b_{\ell\ell}(t)] E_{j\ell,k}^p(t) - \mu_j(t) [1 - b_{jj}(t)] E_{j,k}^{p+1}(t) \\
 & + \beta_j(t) \sum_{\ell=1}^{m_A} \left( \sum_{h=1}^{v_A} a_{\ell,m_A+h}(t) \alpha_{h,k}(t) \right) \lambda_\ell(t) \sum_{q=0}^{p-1} \binom{p}{q} E_{j,\ell}^q(t) \\
 & + \sum_{\ell=1}^{m_A} \left( \sum_{h=1}^{v_A} a_{\ell,m_A+h}(t) \alpha_{h,k}(t) \right) \lambda_\ell(t) E_{j,\ell}^p(t) \\
 & + \sum_{\ell=1}^{m_A} a_{\ell k}(t) \lambda_\ell(t) E_{j,\ell}^p(t) + \sum_{\substack{\ell=1 \\ \ell \neq j}}^{m_B} b_{\ell,m_B+1}(t) \mu_\ell(t) E_{j\ell,k}^p(t) \\
 & + \mu_j(t) [b_{j,m_B+1}(t) + 1 - b_{jj}(t) - b_{j,m_B+1}(t)] \sum_{q=0}^p \binom{p}{q} E_{j,k}^{q+1}(t) (-1)^{p-q} \\
 & + \sum_{\substack{\ell=1 \\ \ell \neq j}}^{m_B} \sum_{\substack{h=1 \\ h \neq \ell \\ h \neq j}}^{m_B} b_{h\ell}(t) \mu_h(t) E_{jh,k}^p(t) + \sum_{\substack{h=1 \\ h \neq j}}^{m_B} b_{hj}(t) \mu_h(t) \sum_{q=0}^p \binom{p}{q} E_{jh,k}^q(t) \\
 = & -\lambda_k(t) E_{j,k}^p(t) - \sum_{\substack{\ell=1 \\ \ell \neq j}}^{m_B} \mu_\ell(t) [1 - b_{\ell\ell}(t)] E_{j\ell,k}^p(t) \\
 & + \beta_j(t) \sum_{\ell=1}^{m_A} \left( \sum_{h=1}^{v_A} a_{\ell,m_A+h}(t) \alpha_{h,k}(t) \right) \lambda_\ell(t) \sum_{q=0}^{p-1} \binom{p}{q} E_{j,\ell}^q(t) \\
 & + \sum_{\ell=1}^{m_A} \left( \sum_{h=1}^{v_A} a_{\ell,m_A+h}(t) \alpha_{h,k}(t) \right) \lambda_\ell(t) E_{j,\ell}^p(t)
 \end{aligned}$$

$$\begin{aligned}
& + \sum_{\ell=1}^{m_A} a_{\ell k}(t) \lambda_{\ell}(t) E_{j,\ell}^p(t) + \sum_{\substack{\ell=1 \\ \ell \neq j}}^{m_B} b_{\ell, m_B+1}(t) \mu_{\ell}(t) E_{j\ell, k}^p(t) \\
& + \mu_j(t) [1 - b_{jj}(t)] \sum_{q=0}^{p-1} \binom{p}{q} E_{j,k}^{q+1}(t) (-1)^{p-q} \\
& + \sum_{\substack{\ell=1 \\ \ell \neq j}}^{m_B} \sum_{\substack{h=1 \\ h \neq \ell \\ h \neq j}}^{m_B} b_{h\ell}(t) \mu_h(t) E_{jh,k}^p(t) + \sum_{\substack{h=1 \\ h \neq j}}^{m_B} b_{hj}(t) \mu_h(t) \sum_{q=0}^p \binom{p}{q} E_{jh,k}^q(t) \\
& = -\lambda_k(t) E_{j,k}^p(t) - \sum_{\substack{\ell=1 \\ \ell \neq j}}^{m_B} \mu_{\ell}(t) [1 - b_{\ell\ell}(t)] E_{j\ell, k}^p(t) \\
& + \beta_j(t) \sum_{\ell=1}^{m_A} \left( \sum_{h=1}^{v_A} a_{\ell, m_A+h}(t) \alpha_{h,k}(t) \right) \lambda_{\ell}(t) \sum_{q=0}^{p-1} \binom{p}{q} E_{j,\ell}^q(t) \\
& + \sum_{\ell=1}^{m_A} \left( \sum_{h=1}^{v_A} a_{\ell, m_A+h}(t) \alpha_{h,k}(t) \right) \lambda_{\ell}(t) E_{j,\ell}^p(t) + \sum_{\ell=1}^{m_A} a_{\ell k}(t) \lambda_{\ell}(t) E_{j,\ell}^p(t) \\
& + \sum_{\substack{\ell=1 \\ \ell \neq j}}^{m_B} b_{\ell, m_B+1}(t) \mu_{\ell}(t) E_{j\ell, k}^p(t) + \mu_j(t) [1 - b_{jj}(t)] \sum_{q=0}^{p-1} \binom{p}{q} E_{j,k}^{q+1}(t) (-1)^{p-q} \\
& + \sum_{\substack{h=1 \\ h \neq j}}^{m_B} [1 - b_{hh}(t) - b_{h, m_B+1}(t) - b_{hj}(t)] \mu_h(t) E_{jh,k}^p(t) + \sum_{\substack{h=1 \\ h \neq j}}^{m_B} b_{hj}(t) \mu_h(t) \sum_{q=0}^p \binom{p}{q} E_{jh,k}^q(t) \\
& = -\lambda_k(t) E_{j,k}^p(t) - \sum_{\substack{\ell=1 \\ \ell \neq j}}^{m_B} \mu_{\ell}(t) [1 - b_{\ell\ell}(t)] E_{j\ell, k}^p(t) \\
& + \beta_j(t) \sum_{\ell=1}^{m_A} \left( \sum_{h=1}^{v_A} a_{\ell, m_A+h}(t) \alpha_{h,k}(t) \right) \lambda_{\ell}(t) \sum_{q=0}^{p-1} \binom{p}{q} E_{j,\ell}^q(t) \\
& + \sum_{\ell=1}^{m_A} \left( \sum_{h=1}^{v_A} a_{\ell, m_A+h}(t) \alpha_{h,k}(t) \right) \lambda_{\ell}(t) E_{j,\ell}^p(t) \\
& + \sum_{\ell=1}^{m_A} a_{\ell k}(t) \lambda_{\ell}(t) E_{j,\ell}^p(t) + \sum_{\substack{\ell=1 \\ \ell \neq j}}^{m_B} b_{\ell, m_B+1}(t) \mu_{\ell}(t) E_{j\ell, k}^p(t)
\end{aligned}$$

$$\begin{aligned}
 & +\mu_j(t)[1-b_{jj}(t)]\sum_{q=0}^{p-1}\binom{p}{q}E_{j,k}^{q+1}(t)(-1)^{p-q} \\
 & +\sum_{\substack{\ell=1 \\ \ell \neq j}}^{m_B}\mu_\ell(t)[1-b_{\ell\ell}(t)]E_{j\ell,k}^p(t)-\sum_{\substack{\ell=1 \\ \ell \neq j}}^{m_B}\mu_\ell(t)b_{\ell,m_B+1}(t)E_{j\ell,k}^p(t) \\
 & -\sum_{\substack{\ell=1 \\ \ell \neq j}}^{m_B}\mu_\ell(t)b_{\ell j}(t)E_{j\ell,k}^p(t)+\sum_{\substack{h=1 \\ h \neq j}}^{m_B}b_{hj}(t)\mu_h(t)\sum_{q=0}^p\binom{p}{q}E_{jh,k}^q(t) \\
 = & -\lambda_k(t)E_{j,k}^p(t)+\beta_j(t)\sum_{\ell=1}^{m_A}\left(\sum_{h=1}^{v_A}a_{\ell,m_A+h}(t)\alpha_{h,k}(t)\right)\lambda_\ell(t)\sum_{q=0}^{p-1}\binom{p}{q}E_{j,\ell}^q(t) \\
 & +\sum_{\ell=1}^{m_A}\left(\sum_{h=1}^{v_A}a_{\ell,m_A+h}(t)\alpha_{h,k}(t)\right)\lambda_\ell(t)E_{j,\ell}^p(t)+\sum_{\ell=1}^{m_A}a_{\ell k}(t)\lambda_\ell(t)E_{j,\ell}^p(t) \\
 & +\mu_j(t)[1-b_{jj}(t)]\sum_{q=0}^{p-1}\binom{p}{q}E_{j,k}^{q+1}(t)(-1)^{p-q}+\sum_{\substack{\ell=1 \\ \ell \neq j}}^{m_B}b_{\ell j}(t)\mu_\ell(t)\sum_{q=0}^{p-1}\binom{p}{q}E_{jh,k}^q(t)
 \end{aligned}$$

□

THEOREM 6. *The  $MAP_t/Ph_t/\infty$  cross-product partial-moment differential equations are*

$$\begin{aligned}
E_{ij,k}(t)' &= \sum_{\ell=1}^{m_B} b_{\ell i}(t) \mu_{\ell} E_{\ell j,k}(t) + \sum_{\ell=1}^{m_B} b_{\ell j}(t) \mu_{\ell} E_{\ell i,k}(t) \\
&\quad - b_{ij}(t) \mu_i(t) E_{i,k}(t) - b_{ji}(t) \mu_j(t) E_{j,k}(t) \\
&\quad - [\mu_i(t) + \mu_j(t)] E_{ij,k}(t) - \lambda_k(t) E_{ij,k}(t) \\
&\quad + \sum_{\ell=1}^{m_A} \lambda_{\ell}(t) a_{\ell k}(t) E_{ij,\ell}(t) + \sum_{\ell=1}^{m_A} \lambda_{\ell}(t) \left( \sum_{h=1}^{v_A} a_{\ell, m_A+h}(t) \alpha_{h,k}(t) \right) E_{ij,\ell}(t) \\
&\quad + \beta_i(t) \sum_{\ell=1}^{m_A} \lambda_{\ell}(t) \left( \sum_{h=1}^{v_A} a_{\ell, m_A+h}(t) \alpha_{h,k}(t) \right) E_{j,\ell}(t) \\
&\quad + \beta_j(t) \sum_{\ell=1}^{m_A} \lambda_{\ell}(t) \left( \sum_{h=1}^{v_A} a_{\ell, m_A+h}(t) \alpha_{h,k}(t) \right) E_{i,\ell}(t).
\end{aligned}$$

$i = 1, 2, \dots, m_B$  and  $j = 1, 2, \dots, m_B$ ,  $i \neq j$ , and  $k = 1, 2, \dots, m_A$ .

**Proof:**

$$\begin{aligned}
E_{ij,k}(t)' &\equiv \sum_{n_1=0}^{\infty} \sum_{n_2=0}^{\infty} \cdots \sum_{n_j=0}^{\infty} \cdots \sum_{n_{m_B}=0}^{\infty} n_i n_j P(t; n_1, n_2, \dots, n_{m_B}, k)' \\
&= \sum_{n_1=0}^{\infty} \sum_{n_2=0}^{\infty} \cdots \sum_{n_j=0}^{\infty} \cdots \sum_{n_{m_B}=0}^{\infty} n_i n_j \times
\end{aligned}$$

$$\begin{aligned}
 & \left\{ - [1 - a_{kk}(t)] \lambda_k(t) P(t; n_1, n_2, \dots, n_{m_B}, k) \right. \\
 & - \sum_{\ell=1}^{m_B} n_\ell \mu_\ell(t) [1 - b_{\ell\ell}(t)] P(t; n_1, n_2, \dots, n_{m_B}, k) \\
 & + \sum_{\ell=1}^{m_A} \left( \sum_{h=1}^{v_A} a_{\ell, m_A+h}(t) \alpha_{h,k}(t) \right) \lambda_\ell(t) \sum_{h=1}^{m_B} I_{[n_h > 0]} \beta_h(t) P(t; n_1, \dots, n_h - 1, \dots, n_{m_B}, \ell) \\
 & + \sum_{\substack{\ell=1 \\ \ell \neq k \\ m_B}}^{m_A} a_{\ell k}(t) \lambda_\ell(t) P(t; n_1, n_2, \dots, n_{m_B}, \ell) \\
 & + \sum_{\ell=1}^{m_B} b_{\ell, m_B+1}(t) [n_\ell + 1] \mu_\ell(t) P(t; n_1, \dots, n_\ell + 1, \dots, n_{m_B}, k) \\
 & + \sum_{\ell=1}^{m_B} I_{[n_\ell > 0]} \sum_{\substack{h=1 \\ h \neq \ell}}^{m_B} b_{h\ell}(t) [n_h + 1] \mu_h(t) P(t; n_1, \dots, n_\ell - 1, \dots, n_h + 1, \dots, n_{m_B}, k) \left. \right\} \\
 & = - [1 - a_{kk}(t)] \lambda_k(t) E_{ij,k}(t) - \sum_{\substack{\ell=1 \\ \ell \neq i \\ \ell \neq j}}^{m_B} \mu_\ell(t) [1 - b_{\ell\ell}(t)] E_{ij\ell,k}(t) \\
 & - \mu_i(t) [1 - b_{ii}(t)] E_{ij,k}^2(t) - \mu_j(t) [1 - b_{jj}(t)] E_{ji,k}^2(t) \\
 & \sum_{\ell=1}^{m_A} \left( \sum_{h=1}^{v_A} a_{\ell, m_A+h}(t) \alpha_{h,k}(t) \right) \lambda_\ell(t) \left\{ \sum_{\substack{h=1 \\ h \neq i \\ h \neq j}}^{m_B} \beta_h(t) E_{ij,\ell}(t) \right. \\
 & \quad \left. + \beta_i(t) \sum_{n_i=0}^{\infty} [n_i + 1] n_j P(t; n_i, n_j, \ell) + \beta_j(t) \sum_{n_j=0}^{\infty} n_i [n_j + 1] P(t; n_i, n_j, \ell) \right\} \\
 & + \sum_{\substack{\ell=1 \\ \ell \neq i \\ \ell \neq j}}^{m_B} b_{\ell, m_B+1}(t) \mu_\ell(t) \sum_{n_\ell=0}^{\infty} \sum_{n_i=0}^{\infty} \sum_{n_j=0}^{\infty} n_i n_j [n_\ell + 1] P(t; n_\ell + 1, n_i, n_j, k) \\
 & + b_{i, m_B+1}(t) \mu_i(t) \sum_{n_i=0}^{\infty} \sum_{n_j=0}^{\infty} n_i n_j [n_i + 1] P(t; n_i + 1, n_j, k) \\
 & + b_{j, m_B+1}(t) \mu_j(t) \sum_{n_i=0}^{\infty} \sum_{n_j=0}^{\infty} n_i n_j [n_j + 1] P(t; n_i, n_j + 1, k)
 \end{aligned}$$

$$\begin{aligned}
& + \sum_{\substack{\ell=1 \\ \ell \neq i \\ \ell \neq j}}^{m_B} \left\{ \sum_{\substack{h=1 \\ h \neq \ell \\ h \neq i \\ h \neq j}}^{m_B} b_{h\ell}(t) \mu_h(t) \sum_{n_\ell=1}^{\infty} \sum_{n_h=0}^{\infty} \sum_{n_i=0}^{\infty} \sum_{n_j=0}^{\infty} n_i n_j (n_h + 1) P(t; n_\ell - 1, n_i, n_j, n_h + 1, k) \right. \\
& \quad + \mu_i(t) b_{i\ell}(t) \sum_{n_\ell=1}^{\infty} \sum_{n_i=0}^{\infty} \sum_{n_j=0}^{\infty} n_i n_j [n_i + 1] P(t; n_\ell - 1, n_i + 1, n_j, k) \\
& \quad \left. + \mu_j(t) b_{j\ell}(t) \sum_{n_\ell=1}^{\infty} \sum_{n_i=0}^{\infty} \sum_{n_j=0}^{\infty} n_i n_j [n_j + 1] P(t; n_\ell - 1, n_i, n_j + 1, k) \right\} \\
& + \sum_{\substack{h=1 \\ h \neq i \\ h \neq j}}^{m_B} b_{hi}(t) \mu_h(t) \sum_{n_h=0}^{\infty} \sum_{n_i=1}^{\infty} \sum_{n_j=0}^{\infty} n_i n_j [n_h + 1] P(t; n_i - 1, n_j, n_h + 1, k) \\
& + \sum_{\substack{h=1 \\ h \neq i \\ h \neq j}}^{m_B} b_{hj}(t) \mu_h(t) \sum_{n_h=0}^{\infty} \sum_{n_i=0}^{\infty} \sum_{n_j=1}^{\infty} n_i n_j [n_h + 1] P(t; n_i, n_j - 1, n_h + 1, k) \\
& + b_{ji}(t) \mu_j(t) \sum_{n_j=0}^{\infty} \sum_{n_i=1}^{\infty} n_i n_j [n_j + 1] P(t; n_i - 1, n_j + 1, k) \\
& + b_{ij}(t) \mu_i(t) \sum_{n_j=1}^{\infty} \sum_{n_i=0}^{\infty} n_i n_j [n_i + 1] P(t; n_j - 1, n_i + 1, k) \\
& + \sum_{\substack{\ell=1 \\ \ell \neq k}}^{m_A} a_{\ell k}(t) \lambda_\ell(t) E_{ij,\ell}(t) \\
& = -[1 - a_{kk}(t)] \lambda_k(t) E_{ij,k}(t) \\
& \quad - \sum_{\substack{\ell=1 \\ \ell \neq i \\ \ell \neq j}}^{m_B} \mu_\ell(t) [1 - b_{\ell\ell}(t)] E_{ij\ell,k}(t) \\
& \quad - \mu_i(t) [1 - b_{ii}(t)] E_{ij,k}^2(t) - \mu_j(t) [1 - b_{jj}(t)] E_{ji,k}^2(t) \\
& \quad \sum_{\ell=1}^{m_A} \left( \sum_{h=1}^{v_A} a_{\ell, m_A+h}(t) \alpha_{h,k}(t) \right) \lambda_\ell(t) \left\{ [1 - \beta_i(t) - \beta_j(t)] E_{ij,\ell}(t) \right.
\end{aligned}$$

$$\begin{aligned}
& + \beta_i(t)[E_{ij,\ell}(t) + E_{j,\ell}(t)] + \beta_j(t)[E_{ij,\ell}(t) + E_{i,\ell}(t)] \Big\} \\
& + \sum_{\substack{\ell=1 \\ \ell \neq i \\ \ell \neq j}}^{m_B} b_{\ell, m_B+1}(t) \mu_\ell(t) E_{ij\ell, k}(t) \\
& + b_{i, m_B+1}(t) \mu_i(t) \sum_{n_i=1}^{\infty} \sum_{n_j=0}^{\infty} [n_i - 1] n_j n_i P(t; n_i, n_j, k) \\
& + b_{j, m_B+1}(t) \mu_j(t) \sum_{n_i=0}^{\infty} \sum_{n_j=1}^{\infty} n_i [n_j - 1] n_j P(t; n_i, n_j, k) \\
& + \sum_{\substack{\ell=1 \\ \ell \neq i \\ \ell \neq j}}^{m_B} \left\{ \sum_{\substack{h=1 \\ h \neq \ell \\ h \neq i \\ h \neq j}}^{m_B} b_{h\ell}(t) \mu_h(t) \sum_{n_\ell=0}^{\infty} \sum_{n_h=1}^{\infty} \sum_{n_i=0}^{\infty} \sum_{n_j=0}^{\infty} n_i n_j n_h P(t; n_\ell, n_i, n_j, n_h, k) \right. \\
& \quad + \mu_i(t) b_{i\ell}(t) \sum_{n_\ell=0}^{\infty} \sum_{n_i=1}^{\infty} \sum_{n_j=0}^{\infty} [n_i - 1] n_j n_i P(t; n_\ell, n_i, n_j, k) \\
& \quad \left. + \mu_j(t) b_{j\ell}(t) \sum_{n_\ell=0}^{\infty} \sum_{n_i=0}^{\infty} \sum_{n_j=1}^{\infty} n_i [n_j - 1] n_j P(t; n_\ell, n_i, n_j, k) \right\} \\
& + \sum_{\substack{h=1 \\ h \neq i \\ h \neq j}}^{m_B} b_{hi}(t) \mu_h(t) \sum_{n_h=1}^{\infty} \sum_{n_i=0}^{\infty} \sum_{n_j=0}^{\infty} [n_i + 1] n_j n_h P(t; n_i, n_j, n_h, k) \\
& + \sum_{\substack{h=1 \\ h \neq i \\ h \neq j}}^{m_B} b_{hj}(t) \mu_h(t) \sum_{n_h=1}^{\infty} \sum_{n_i=0}^{\infty} \sum_{n_j=0}^{\infty} n_i [n_j + 1] n_h P(t; n_i, n_j, n_h, k) \\
& + b_{ji}(t) \mu_j(t) \sum_{n_j=1}^{\infty} \sum_{n_i=0}^{\infty} [n_i + 1] [n_j - 1] n_j P(t; n_i, n_j, k) \\
& + b_{ij}(t) \mu_i(t) \sum_{n_j=0}^{\infty} \sum_{n_i=1}^{\infty} [n_i - 1] [n_j + 1] n_i P(t; n_j, n_i, k)
\end{aligned}$$

$$\begin{aligned}
& + \sum_{\substack{\ell=1 \\ \ell \neq k}}^{m_A} a_{\ell k}(t) \lambda_{\ell}(t) E_{ij, \ell}(t) \\
& = -\lambda_k(t) E_{ij, k}(t) - \sum_{\substack{\ell=1 \\ \ell \neq i \\ \ell \neq j}}^{m_B} \mu_{\ell}(t) [1 - b_{\ell \ell}(t)] E_{ij \ell, k}(t) \\
& \quad - \mu_i(t) [1 - b_{ii}(t)] E_{ij, k}^2(t) - \mu_j(t) [1 - b_{jj}(t)] E_{ji, k}^2(t) \\
& \quad \sum_{\ell=1}^{m_A} \left( \sum_{h=1}^{v_A} a_{\ell, m_A+h}(t) \alpha_{h, k}(t) \right) \lambda_{\ell}(t) \left\{ E_{ij, \ell}(t) + \beta_i(t) E_{j, \ell}(t) + \beta_j(t) E_{i, \ell}(t) \right\} \\
& \quad + b_{i, m_B+1}(t) \mu_i(t) [E_{ij, k}^2(t) - E_{ij, k}(t)] + b_{j, m_B+1}(t) \mu_j(t) [E_{ji, k}^2(t) - E_{ij, k}(t)] \\
& \quad + \sum_{\substack{\ell=1 \\ \ell \neq i \\ \ell \neq j}}^{m_B} b_{\ell, m_B+1}(t) \mu_{\ell}(t) E_{ij \ell, k}(t) + \sum_{\substack{\ell=1 \\ \ell \neq i \\ \ell \neq j}}^{m_B} \left\{ \sum_{\substack{h=1 \\ h \neq \ell \\ h \neq i \\ h \neq j}}^{m_B} b_{h \ell}(t) \mu_h(t) E_{ij h, k}(t) \right. \\
& \quad \left. + \mu_i(t) b_{i \ell}(t) [E_{ij, k}^2(t) - E_{ij, k}(t)] + \mu_j(t) b_{j \ell}(t) [E_{ji, k}^2(t) - E_{ij, k}(t)] \right\} \\
& \quad + \sum_{\substack{h=1 \\ h \neq i \\ h \neq j}}^{m_B} b_{hi}(t) \mu_h(t) [E_{ij h, k}(t) + E_{j h, k}(t)] + \sum_{\substack{h=1 \\ h \neq i \\ h \neq j}}^{m_B} b_{hj}(t) \mu_h(t) [E_{ij h, k}(t) + E_{i h, k}(t)] \\
& \quad + \sum_{\ell=1}^{m_A} a_{\ell k}(t) \lambda_{\ell}(t) E_{ij, \ell}(t) \\
& \quad + b_{ji}(t) \mu_j(t) [E_{ji, k}^2(t) - E_{ij, k}(t) + E_{j, k}^2(t) - E_{j, k}(t)] \\
& \quad + b_{ij}(t) \mu_i(t) [E_{ij, k}^2(t) - E_{ij, k}(t) + E_{i, k}^2(t) - E_{i, k}(t)] \\
& = -\lambda_k(t) E_{ij, k}(t) - \sum_{\substack{\ell=1 \\ \ell \neq i \\ \ell \neq j}}^{m_B} \mu_{\ell}(t) E_{ij \ell, k}(t) + \sum_{\substack{\ell=1 \\ \ell \neq i \\ \ell \neq j}}^{m_B} \mu_{\ell}(t) b_{\ell \ell}(t) E_{ij \ell, k}(t) + \sum_{\substack{\ell=1 \\ \ell \neq i \\ \ell \neq j}}^{m_B} \mu_{\ell}(t) b_{\ell, m_B+1}(t) E_{ij \ell, k}(t) \\
& \quad - \mu_i(t) [1 - b_{ii}(t)] E_{ij, k}^2(t) - \mu_j(t) [1 - b_{jj}(t)] E_{ji, k}^2(t)
\end{aligned}$$



$$\begin{aligned}
 & + \sum_{\ell=1}^{m_A} \left\{ \left( \sum_{h=1}^{v_A} a_{\ell, m_A+h}(t) \alpha_{h,k}(t) \right) \lambda_{\ell}(t) E_{ij,\ell}(t) + \beta_i(t) E_{j,\ell}(t) + \beta_j(t) E_{i,\ell}(t) \right\} \\
 & + b_{i, m_B+1}(t) \mu_i(t) \left[ E_{ij,k}^2(t) - E_{ij,k}(t) \right] + b_{j, m_B+1}(t) \mu_j(t) \left[ E_{ji,k}^2(t) - E_{ij,k}(t) \right] \\
 & + \sum_{\substack{\ell=1 \\ \ell \neq i \\ \ell \neq j}}^{m_B} \sum_{\substack{h=1 \\ h \neq \ell \\ h \neq i \\ h \neq j}}^{m_B} b_{h\ell}(t) \mu_h(t) E_{ijh,k}(t) \\
 & + \mu_i(t) \sum_{\substack{\ell=1 \\ \ell \neq i \\ \ell \neq j}}^{m_B} b_{i\ell}(t) \left[ E_{ij,k}^2(t) - E_{ij,k}(t) \right] + \mu_j(t) \sum_{\substack{\ell=1 \\ \ell \neq i \\ \ell \neq j}}^{m_B} b_{j\ell}(t) \left[ E_{ji,k}^2(t) - E_{ij,k}(t) \right] \\
 & + \sum_{\substack{h=1 \\ h \neq i \\ h \neq j}}^{m_B} b_{hi}(t) \mu_h(t) \left[ E_{ijh,k}(t) + E_{jh,k}(t) \right] + \sum_{\substack{h=1 \\ h \neq i \\ h \neq j}}^{m_B} b_{hj}(t) \mu_h(t) \left[ E_{ijh,k}(t) + E_{ih,k}(t) \right] \\
 & + b_{ji}(t) \mu_j(t) \left[ E_{ji,k}^2(t) - E_{ij,k}(t) + E_{j,k}^2(t) - E_{j,k}(t) \right] \\
 & + b_{ij}(t) \mu_i(t) \left[ E_{ij,k}^2(t) - E_{ij,k}(t) + E_{i,k}^2(t) - E_{i,k}(t) \right] \\
 & + \sum_{\ell=1}^{m_A} a_{\ell k}(t) \lambda_{\ell}(t) E_{ij,\ell}(t) \\
 = & -\lambda_k(t) E_{ij,k}(t) - \sum_{\substack{\ell=1 \\ \ell \neq i \\ \ell \neq j}}^{m_B} \mu_{\ell}(t) E_{ij\ell,k}(t) + \sum_{\substack{\ell=1 \\ \ell \neq i \\ \ell \neq j}}^{m_B} \mu_{\ell}(t) b_{\ell\ell}(t) E_{ij\ell,k}(t) + \sum_{\ell=1}^{m_B} \mu_{\ell}(t) b_{\ell, m_B+1}(t) E_{ij\ell,k}(t) \\
 & - \mu_i(t) E_{ij,k}^2(t) - \mu_j(t) E_{ji,k}^2(t) \\
 & + \sum_{\ell=1}^{m_A} \left\{ \left( \sum_{h=1}^{v_A} a_{\ell, m_A+h}(t) \alpha_{h,k}(t) \right) \lambda_{\ell}(t) E_{ij,\ell}(t) + \beta_i(t) E_{j,\ell}(t) + \beta_j(t) E_{i,\ell}(t) \right\} \\
 & - b_{i, m_B+1}(t) \mu_i(t) E_{ij,k}(t) - b_{j, m_B+1}(t) \mu_j(t) E_{ij,k}(t) \\
 & + \sum_{\substack{\ell=1 \\ \ell \neq i \\ \ell \neq j}}^{m_B} \sum_{\substack{h=1 \\ h \neq \ell \\ h \neq i \\ h \neq j}}^{m_B} b_{h\ell}(t) \mu_h(t) E_{ijh,k}(t)
 \end{aligned}$$

$$\begin{aligned}
& + \mu_i(t) \left\{ \sum_{\substack{\ell=1 \\ \ell \neq i}}^{m_B} b_{i\ell}(t) \right\} [E_{ij,k}^2(t) - E_{ij,k}(t)] + \mu_j(t) \left\{ \sum_{\substack{\ell=1 \\ \ell \neq j}}^{m_B} b_{j\ell}(t) \right\} [E_{ji,k}^2(t) - E_{ji,k}(t)] \\
& + \sum_{\substack{h=1 \\ h \neq i}}^{m_B} b_{hi}(t) \mu_h(t) [E_{ijh,k}(t) + E_{jh,k}(t)] - b_{ji}(t) \mu_j(t) E_{ji,k}^2(t) \\
& + \sum_{\substack{h=1 \\ h \neq j}}^{m_B} b_{hj}(t) \mu_h(t) [E_{ijh,k}(t) + E_{ih,k}(t)] - b_{ij}(t) \mu_i(t) E_{ij,k}^2(t) \\
& - b_{ji}(t) \mu_j(t) E_{j,k}(t) - b_{ij}(t) \mu_i(t) E_{i,k}(t) + \sum_{\ell=1}^{m_A} a_{\ell k}(t) \lambda_{\ell}(t) E_{ij,\ell}(t) \\
& = -\lambda_k(t) E_{ij,k}(t) - \sum_{\substack{\ell=1 \\ \ell \neq i \\ \ell \neq j}}^{m_B} \mu_{\ell}(t) E_{ij\ell,k}(t) + \sum_{\ell=1}^{m_B} \mu_{\ell}(t) b_{\ell m_B+1}(t) E_{ij\ell,k}(t) \\
& - \mu_i(t) E_{ij,k}^2(t) - \mu_j(t) E_{ji,k}^2(t) \\
& + \sum_{\ell=1}^{m_A} \left\{ \left( \sum_{h=1}^{v_A} a_{\ell, m_A+h}(t) \alpha_{h,k}(t) \right) \lambda_{\ell}(t) E_{ij,\ell}(t) + \beta_i(t) E_{j,\ell}(t) + \beta_j(t) E_{i,\ell}(t) \right\} \\
& - b_{i, m_B+1}(t) \mu_i(t) E_{ij,k}(t) - b_{j, m_B+1}(t) \mu_j(t) E_{ij,k}(t) \\
& + \sum_{\substack{h=1 \\ h \neq i \\ h \neq j}}^{m_B} \mu_h(t) E_{ijh,k}(t) - \sum_{\substack{h=1 \\ h \neq i \\ h \neq j}}^{m_B} b_{hi}(t) \mu_h(t) E_{ijh,k}(t) - \sum_{\substack{h=1 \\ h \neq i \\ h \neq j}}^{m_B} b_{hj}(t) \mu_h(t) E_{ijh,k}(t) \\
& - \sum_{\substack{h=1 \\ h \neq i \\ h \neq j}}^{m_B} b_{h, m_B+1}(t) \mu_h(t) E_{ijh,k}(t) \\
& + \mu_i(t) (E_{ij,k}^2(t) - E_{ij,k}(t)) (1 - b_{i, m_B+1}(t)) + \mu_j(t) (E_{ji,k}^2(t) - E_{ji,k}(t)) (1 - b_{j, m_B+1}(t)) \\
& + \sum_{h=1}^{m_B} b_{hi}(t) \mu_h(t) [E_{ijh,k}(t) + E_{jh,k}(t)] + \sum_{h=1}^{m_B} b_{hj}(t) \mu_h(t) [E_{ijh,k}(t) + E_{ih,k}(t)] \\
& - b_{ji}(t) \mu_j(t) E_{ji,k}^2(t) - b_{ij}(t) \mu_i(t) E_{ij,k}^2(t) - b_{ji}(t) \mu_j(t) E_{j,k}(t) - b_{ij}(t) \mu_i(t) E_{i,k}(t)
\end{aligned}$$

$$\begin{aligned}
& -\mu_i(t)b_{ii}(t)E_{ij,k}^2(t) - \mu_j(t)b_{jj}(t)E_{ji,k}^2(t) + \sum_{\ell=1}^{m_A} a_{\ell k}(t)\lambda_{\ell}(t)E_{ij,\ell}(t) \\
& = -\lambda_k(t)E_{ij,k}(t) + \sum_{\ell=1}^{m_B} \mu_{\ell}(t)b_{\ell,m_B+1}(t)E_{ij\ell,k}(t) \\
& \quad + \sum_{\ell=1}^{m_A} \left\{ \left( \sum_{h=1}^{v_A} a_{\ell,m_A+h}(t)\alpha_{h,k}(t) \right) \lambda_{\ell}(t)E_{ij,\ell}(t) + \beta_i(t)E_{j,\ell}(t) + \beta_j(t)E_{i,\ell}(t) \right\} \\
& \quad - \mu_i(t)E_{ij,k}(t) - \mu_i(t)b_{i,m_B+1}(t)E_{ij,k}^2(t) - \mu_j(t)E_{ij,k}(t) - \mu_j(t)b_{j,m_B+1}(t)E_{ji,k}^2(t) \\
& \quad - \sum_{\substack{h=1 \\ h \neq i \\ h \neq j}}^{m_B} b_{h,m_B+1}(t)\mu_h(t)E_{ijh,k}(t) + \sum_{h=1}^{m_B} b_{hi}(t)\mu_h(t)E_{jh,k}(t) + \sum_{h=1}^{m_B} b_{hj}(t)\mu_h(t)E_{ih,k}(t) \\
& \quad - b_{ji}(t)\mu_j(t)E_{ij,k}(t) - b_{ij}(t)\mu_i(t)E_{ij,k}(t) + \sum_{\ell=1}^{m_A} a_{\ell k}(t)\lambda_{\ell}(t)E_{ij,\ell}(t) \\
& = \sum_{h=1}^{m_B} b_{hi}(t)\mu_h(t)E_{jh,k}(t) + \sum_{h=1}^{m_B} b_{hj}(t)\mu_h(t)E_{ih,k}(t) \\
& \quad - b_{ij}(t)\mu_i(t)E_{i,k}(t) - b_{ji}(t)\mu_j(t)E_{j,k}(t) - [\mu_i(t) + \mu_j(t)]E_{ij,k}(t) \\
& \quad + \sum_{\ell=1}^{m_A} \left\{ \left( \sum_{h=1}^{v_A} a_{\ell,m_A+h}(t)\alpha_{h,k}(t) \right) \lambda_{\ell}(t)E_{ij,\ell}(t) + \beta_i(t)E_{j,\ell}(t) + \beta_j(t)E_{i,\ell}(t) \right\} \\
& \quad - \lambda_k(t)E_{ij,k}(t) + \sum_{\ell=1}^{m_A} a_{\ell k}(t)\lambda_{\ell}(t)E_{ij,\ell}(t)
\end{aligned}$$

□

## Acknowledgments

This research was partially supported by National Science Foundation Grants DMI-9622065 and DMI-9821011.

## References

- Nelson BL, Taaffe MR (2004) The  $Ph(t)/Ph(t)/\infty$  queueing system: Part I – The single node. *INFORMS Journal on Computing* 16:266–74.
- Whitt W, Massey WA (1993) Networks of infinite-server queues with nonstationary Poisson input. *Queueing Systems* 13(1):183–250.
