# Supplementary material for: Technical Note: The MAPt/Pht/∞ Queueing System and Multiclass [MAPt/Pht/∞]K Queueing Network
Source: Atypon-hosted journal article supplement (doi:10.1287/ijoc.2016.0736), 2017-04-25
Supplement: ijoc.2016.0736-sm.zip [file Proofs-for-NelsonTaaffe-Paper-1.pdf › Proofs-for-NelsonTaaffe-Paper-1.pdf]

Proofs for:

The  $Ph_t/Ph_t/\infty$  Queueing System:

Part I—The Single Node

Barry L. Nelson • Michael R. Taaffe

*Department of Industrial Engineering & Management Sciences, Northwestern University,  
Evanston, Illinois 60208*

*Department of Industrial and Systems Engineering, Virginia Tech, Blacksburg, Virginia  
24061*

nelsonb@northwestern.edu • taaffe@vt.edu

## Proofs

**Theorem 3** *The  $Ph_t/Ph_t/\infty$  arrival-process state-probability differential equations (ADE's) are:*

$$P(t; \cdot, k)' = \alpha_k(t) \sum_{\ell=1}^{m_A} a_{\ell, m_A+1}(t) \lambda_{\ell}(t) P(t; \cdot, \ell) + \sum_{\ell=1}^{m_A} a_{\ell k}(t) \lambda_{\ell}(t) P(t; \cdot, \ell) - \lambda_k(t) P(t; \cdot, k)$$

for  $k = 1, 2, \dots, m_A$ .

**Proof:** While we can show this result by straightforward and tedious algebraic manipulation of the expression

$$P(t; \cdot, k)' \equiv \sum_{n_1=0}^{\infty} \sum_{n_2=0}^{\infty} \cdots \sum_{n_j=0}^{\infty} \cdots \sum_{n_{m_B}=0}^{\infty} P(t; n_1, n_2, \dots, n_{m_B}, k)'.$$

We also note that the arrival process is independent of the service process and therefore we can formulate the Kolmogorov forward equations associated with this simple time-dependent Markov arrival process directly.  $\square$

**Theorem 4** *The  $Ph_t/Ph_t/\infty$   $p^{\text{th}}$ -partial-moment differential equations ( $p^{\text{th}}$  PMDE's):*

$$\begin{aligned} \frac{d}{dt} E_{j,k}^p(t) = & - \lambda_k(t) E_{j,k}^p(t) + [1 - b_{jj}(t)] \mu_j(t) \sum_{q=0}^{p-1} \binom{p}{q} E_{j,k}^{q+1}(t) (-1)^{p-q} \\ & + \alpha_k(t) \sum_{\ell=1}^{m_A} \lambda_{\ell}(t) a_{\ell, m_A+1}(t) E_{j,\ell}^p(t) \end{aligned}$$

$$\begin{aligned}
& + \alpha_k(t) \beta_j(t) \sum_{\ell=1}^{m_A} \lambda_\ell(t) a_{\ell, m_A+1}(t) \sum_{q=0}^{p-1} \binom{p}{q} E_{j,\ell}^q(t) \\
& + \sum_{\ell=1}^{m_A} \lambda_\ell(t) a_{\ell k}(t) E_{j,\ell}^p(t) \\
& + \sum_{\substack{\ell=1 \\ \ell \neq j}}^{m_B} \mu_\ell(t) b_{\ell j}(t) \sum_{q=0}^{p-1} \binom{p}{q} E_{j,\ell,k}^q(t)
\end{aligned}$$

for  $i = 1, 2, \dots, m_A$ ,  $j = 1, 2, \dots, m_B$ , and  $p = 0, 1, 2, \dots$

**Proof:**

$$\begin{aligned}
\frac{d}{dt} E_{j,k}^p(t) & \equiv \sum_{n_1=0}^{\infty} \sum_{n_2=0}^{\infty} \cdots \sum_{n_j=0}^{\infty} \cdots \sum_{n_{m_B}=0}^{\infty} n_j^p P(t; n_1, n_2, \dots, n_{m_B}, k)' \\
& = \sum_{n_1=0}^{\infty} \sum_{n_2=0}^{\infty} \cdots \sum_{n_j=0}^{\infty} \cdots \sum_{n_{m_B}=0}^{\infty} n_j^p \times \\
& \quad \left\{ - [1 - a_{kk}(t)] \lambda_k(t) P(t; n_1, n_2, \dots, n_{m_B}, k) \right. \\
& \quad - \sum_{\ell=1}^{m_B} n_\ell \mu_\ell(t) [1 - b_{\ell\ell}(t)] P(t; n_1, n_2, \dots, n_{m_B}, k) \\
& \quad + \sum_{\ell=1}^{m_A} a_{\ell, m_A+1}(t) \alpha_k(t) \lambda_\ell(t) \sum_{h=1}^{m_B} I_{[n_h > 0]} \beta_h(t) P(t; n_1, \dots, n_h - 1, \dots, n_{m_B}, \ell) \\
& \quad + \sum_{\substack{\ell=1 \\ \ell \neq k}}^{m_A} a_{\ell k}(t) \lambda_\ell(t) P(t; n_1, n_2, \dots, n_{m_B}, \ell) \\
& \quad + \sum_{\ell=1}^{m_B} b_{\ell, m_B+1}(t) [n_\ell + 1] \mu_\ell(t) P(t; n_1, \dots, n_\ell + 1, \dots, n_{m_B}, k) \\
& \quad \left. + \sum_{\ell=1}^{m_B} I_{[n_\ell > 0]} \sum_{\substack{h=1 \\ h \neq \ell}}^{m_B} b_{h\ell}(t) [n_h + 1] \mu_h(t) P(t; n_1, \dots, n_\ell - 1, \dots, n_h + 1, \dots, n_{m_B}, k) \right\} \\
& = -[1 - a_{kk}(t)] \lambda_k(t) E_{j,k}^p(t) \\
& \quad - \sum_{\substack{\ell=1 \\ \ell \neq j}}^{m_B} \mu_\ell(t) [1 - b_{\ell\ell}(t)] E_{j,\ell,k}^p(t) - \mu_j(t) [1 - b_{jj}(t)] E_{j,k}^{p+1}(t) \\
& \quad + \alpha_k(t) \sum_{\ell=1}^{m_A} a_{\ell, m_A+1}(t) \lambda_\ell(t) \left\{ \sum_{\substack{h=1 \\ h \neq j}}^{m_B} \beta_h(t) E_{j,\ell}^p(t) + \beta_j(t) \sum_{n_j=0}^{\infty} [n_j + 1]^p P(t; n_j, \ell) \right\}
\end{aligned}$$

$$\begin{aligned}
& + \sum_{\substack{\ell=1 \\ \ell \neq k}}^{m_A} a_{\ell k}(t) \lambda_\ell(t) \mathbf{E}_{j,\ell}^p(t) \\
& + \sum_{\substack{\ell=1 \\ \ell \neq j}}^{m_B} b_{\ell, m_B+1}(t) \mu_\ell(t) \sum_{n_\ell=0}^{\infty} \sum_{n_j=0}^{\infty} n_j^p [n_\ell + 1] \mathbf{P}(t; n_{\ell+1}, n_j, k) \\
& + b_{j, m_B+1}(t) \mu_j(t) \sum_{n_j=0}^{\infty} n_j^p [n_j + 1] \mathbf{P}(t; n_j + 1, k) \\
& + \sum_{\substack{\ell=1 \\ \ell \neq j}}^{m_B} \left\{ \sum_{\substack{h=1 \\ h \neq \ell \\ h \neq j}}^{m_B} b_{h\ell}(t) \mu_h(t) \sum_{n_\ell=1}^{\infty} \sum_{n_h=0}^{\infty} \sum_{n_j=0}^{\infty} n_j^p [n_h + 1] \mathbf{P}(t; n_\ell - 1, n_j, n_h + 1, k) \right. \\
& \quad \left. + \mu_j(t) b_{j\ell}(t) \sum_{n_\ell=1}^{\infty} \sum_{n_j=0}^{\infty} n_j^p [n_j + 1] \mathbf{P}(t; n_\ell - 1, n_j + 1, k) \right\} \\
& + \sum_{\substack{h=1 \\ h \neq j}}^{m_B} b_{hj}(t) \mu_h(t) \sum_{n_h=0}^{\infty} \sum_{n_j=1}^{\infty} n_j^p [n_h + 1] \mathbf{P}(t; n_j - 1, n_h + 1, k) \\
= & - \lambda_k(t) \mathbf{E}_{j,k}^p(t) \\
& - \sum_{\substack{\ell=1 \\ \ell \neq j}}^{m_B} \mu_\ell(t) [1 - b_{\ell\ell}(t)] \mathbf{E}_{j\ell,k}^p(t) - \mu_j(t) [1 - b_{jj}(t)] \mathbf{E}_{j,k}^{p+1}(t) \\
& + \alpha_k(t) \sum_{\ell=1}^{m_A} a_{\ell, m_A+1}(t) \lambda_\ell(t) \left\{ [1 - \beta_j(t)] \mathbf{E}_{j,\ell}^p(t) + \beta_j(t) \sum_{q=0}^p \binom{p}{q} \mathbf{E}_{j,\ell}^q(t) \right\} \\
& + \sum_{\ell=1}^{m_A} a_{\ell k}(t) \lambda_\ell(t) \mathbf{E}_{j,\ell}^p(t) \\
& + \sum_{\ell=1}^{m_B} b_{\ell, m_B+1}(t) \mu_\ell(t) \sum_{n_\ell=1}^{\infty} \sum_{n_j=0}^{\infty} n_j^p n_\ell \mathbf{P}(t; n_\ell, n_j, k) \\
& + b_{j, m_B+1}(t) \mu_j(t) \sum_{n_j=1}^{\infty} [n_j - 1]^p n_j \mathbf{P}(t; n_j, k) \\
& + \sum_{\substack{\ell=1 \\ \ell \neq j}}^{m_B} \sum_{\substack{h=1 \\ h \neq \ell \\ h \neq j}}^{m_B} b_{h\ell}(t) \mu_h(t) \sum_{n_\ell=0}^{\infty} \sum_{n_h=0}^{\infty} \sum_{n_j=0}^{\infty} n_j^p [n_h + 1] \mathbf{P}(t; n_\ell, n_j, n_h + 1, k) \\
& + \mu_j(t) \sum_{\substack{\ell=1 \\ \ell \neq j}}^{m_B} b_{j\ell}(t) \sum_{n_j=1}^{\infty} [n_j - 1]^p n_j \sum_{n_\ell=0}^{\infty} \mathbf{P}(t; n_\ell, n_j, k)
\end{aligned}$$

$$\begin{aligned}
& + \sum_{\substack{h=1 \\ h \neq j}}^{m_B} b_{hj}(t) \mu_h(t) \sum_{n_h=0}^{\infty} \sum_{n_j=0}^{\infty} [n_j + 1]^p [n_h + 1] \mathbb{P}(t; n_j, n_h + 1, k) \\
= & -\lambda_k(t) \mathbb{E}_{j,k}^p(t) \\
& - \sum_{\substack{\ell=1 \\ \ell \neq j}}^{m_B} \mu_\ell(t) [1 - b_{\ell\ell}(t)] \mathbb{E}_{j,\ell,k}^p(t) - \mu_j(t) [1 - b_{jj}(t)] \mathbb{E}_{j,k}^{p+1}(t) \\
& + \alpha_k(t) \beta_j(t) \sum_{\ell=1}^{m_A} a_{\ell, m_A+1}(t) \lambda_\ell(t) \sum_{q=0}^p \binom{p}{q} \mathbb{E}_{j,\ell}^q(t) \\
& + \alpha_k(t) (1 - \beta_j(t)) \sum_{\ell=1}^{m_A} a_{\ell, m_A+1}(t) \lambda_\ell(t) \mathbb{E}_{j,\ell}^p(t) \\
& + \sum_{\ell=1}^{m_A} a_{\ell k}(t) \lambda_\ell(t) \mathbb{E}_{j,\ell}^p(t) \\
& + \sum_{\substack{\ell=1 \\ \ell \neq j}}^{m_B} b_{\ell, m_B+1}(t) \mu_\ell(t) \mathbb{E}_{j,\ell,k}^p(t) \\
& + b_{j, m_B+1}(t) \mu_j(t) \sum_{q=0}^p \binom{p}{q} \mathbb{E}_{j,k}^{q+1}(t) (-1)^{p-q} \\
& + \sum_{\substack{\ell=1 \\ \ell \neq j}}^{m_B} \sum_{\substack{h=1 \\ h \neq \ell \\ h \neq j}}^{m_B} b_{h\ell}(t) \mu_h(t) \sum_{n_\ell=0}^{\infty} \sum_{n_h=1}^{\infty} \sum_{n_j=0}^{\infty} n_j^p n_h \mathbb{P}(t; n_\ell, n_j, n_h, k) \\
& + \mu_j(t) \sum_{\substack{\ell=1 \\ \ell \neq j}}^{m_B} b_{j\ell}(t) \sum_{n_j=1}^{\infty} [n_j - 1]^p n_j \mathbb{P}(t; n_j, k) \\
& + \sum_{\substack{h=1 \\ h \neq j}}^{m_B} b_{hj}(t) \mu_h(t) \sum_{n_h=1}^{\infty} \sum_{n_j=0}^{\infty} [n_j + 1]^p n_h \mathbb{P}(t; n_j, n_h, k) \\
= & -\lambda_k(t) \mathbb{E}_{j,k}^p(t) \\
& - \sum_{\substack{\ell=1 \\ \ell \neq j}}^{m_B} \mu_\ell(t) [1 - b_{\ell\ell}(t)] \mathbb{E}_{j,\ell,k}^p(t) - \mu_j(t) [1 - b_{jj}(t)] \mathbb{E}_{j,k}^{p+1}(t) \\
& + \alpha_k(t) \beta_j(t) \sum_{\ell=1}^{m_A} a_{\ell, m_A+1}(t) \lambda_\ell(t) \sum_{q=0}^{p-1} \binom{p}{q} \mathbb{E}_{j,\ell}^q(t)
\end{aligned}$$

$$\begin{aligned}
& +\alpha_k(t) \sum_{\ell=1}^{m_A} a_{\ell, m_A+1}(t) \lambda_\ell(t) E_{j,\ell}^p(t) \\
& + \sum_{\ell=1}^{m_A} a_{\ell k}(t) \lambda_\ell(t) E_{j,\ell}^p(t) \\
& + \sum_{\substack{\ell=1 \\ \ell \neq j}}^{m_B} b_{\ell, m_B+1}(t) \mu_\ell(t) E_{j\ell, k}^p(t) \\
& + b_{j, m_B+1}(t) \mu_j(t) \sum_{q=0}^p \binom{p}{q} E_{j,k}^{q+1}(t) (-1)^{p-q} \\
& + \sum_{\substack{\ell=1 \\ \ell \neq j}}^{m_B} \sum_{\substack{h=1 \\ h \neq \ell \\ h \neq j}}^{m_B} b_{h\ell}(t) \mu_h(t) E_{jh, k}^p(t) \\
& + \mu_j(t) \sum_{\substack{\ell=1 \\ \ell \neq j}}^{m_B} b_{j\ell}(t) \sum_{q=0}^p \binom{p}{q} E_{j,k}^{q+1}(t) (-1)^{p-q} \\
& + \sum_{\substack{h=1 \\ h \neq j}}^{m_B} b_{hj}(t) \mu_h(t) \sum_{q=0}^p \binom{p}{q} E_{jh, k}^q(t) \\
= & -\lambda_k(t) E_{j,k}^p(t) \\
& - \sum_{\substack{\ell=1 \\ \ell \neq j}}^{m_B} \mu_\ell(t) [1 - b_{\ell\ell}(t)] E_{j\ell, k}^p(t) - \mu_j(t) [1 - b_{jj}(t)] E_{j,k}^{p+1}(t) \\
& + \alpha_k(t) \beta_j(t) \sum_{\ell=1}^{m_A} a_{\ell, m_A+1}(t) \lambda_\ell(t) \sum_{q=0}^{p-1} \binom{p}{q} E_{j,\ell}^q(t) \\
& + \alpha_k(t) \sum_{\ell=1}^{m_A} a_{\ell, m_A+1}(t) \lambda_\ell(t) E_{j,\ell}^p(t) \\
& + \sum_{\ell=1}^{m_A} a_{\ell k}(t) \lambda_\ell(t) E_{j,\ell}^p(t) \\
& + \sum_{\substack{\ell=1 \\ \ell \neq j}}^{m_B} b_{\ell, m_B+1}(t) \mu_\ell(t) E_{j\ell, k}^p(t) \\
& + \mu_j(t) [b_{j, m_B+1}(t) + 1 - b_{jj}(t) - b_{j, m_B+1}(t)] \sum_{q=0}^p \binom{p}{q} E_{j,k}^{q+1}(t) (-1)^{p-q}
\end{aligned}$$

$$\begin{aligned}
& + \sum_{\substack{\ell=1 \\ \ell \neq j}}^{m_B} \sum_{\substack{h=1 \\ h \neq \ell \\ h \neq j}}^{m_B} b_{h\ell}(t) \mu_h(t) \mathbf{E}_{jh,k}^p(t) \\
& + \sum_{\substack{h=1 \\ h \neq j}}^{m_B} b_{hj}(t) \mu_h(t) \sum_{q=0}^p \binom{p}{q} \mathbf{E}_{jh,k}^q(t) \\
= & -\lambda_k(t) \mathbf{E}_{j,k}^p(t) \\
& - \sum_{\substack{\ell=1 \\ \ell \neq j}}^{m_B} \mu_\ell(t) [1 - b_{\ell\ell}(t)] \mathbf{E}_{j\ell,k}^p(t) \\
& + \alpha_k(t) \beta_j(t) \sum_{\ell=1}^{m_A} a_{\ell, m_A+1}(t) \lambda_\ell(t) \sum_{q=0}^{p-1} \binom{p}{q} \mathbf{E}_{j,\ell}^q(t) \\
& + \alpha_k(t) \sum_{\ell=1}^{m_A} a_{\ell, m_A+1}(t) \lambda_\ell(t) \mathbf{E}_{j,\ell}^p(t) \\
& + \sum_{\ell=1}^{m_A} a_{\ell k}(t) \lambda_\ell(t) \mathbf{E}_{j,\ell}^p(t) \\
& + \sum_{\substack{\ell=1 \\ \ell \neq j}}^{m_B} b_{\ell, m_B+1}(t) \mu_\ell(t) \mathbf{E}_{j\ell,k}^p(t) \\
& + \mu_j(t) [1 - b_{jj}(t)] \sum_{q=0}^{p-1} \binom{p}{q} \mathbf{E}_{j,k}^{q+1}(t) (-1)^{p-q} \\
& + \sum_{\substack{\ell=1 \\ \ell \neq j}}^{m_B} \sum_{\substack{h=1 \\ h \neq \ell \\ h \neq j}}^{m_B} b_{h\ell}(t) \mu_h(t) \mathbf{E}_{jh,k}^p(t) \\
& + \sum_{\substack{h=1 \\ h \neq j}}^{m_B} b_{hj}(t) \mu_h(t) \sum_{q=0}^p \binom{p}{q} \mathbf{E}_{jh,k}^q(t) \\
= & -\lambda_k(t) \mathbf{E}_{j,k}^p(t) \\
& - \sum_{\substack{\ell=1 \\ \ell \neq j}}^{m_B} \mu_\ell(t) [1 - b_{\ell\ell}(t)] \mathbf{E}_{j\ell,k}^p(t) \\
& + \alpha_k(t) \beta_j(t) \sum_{\ell=1}^{m_A} a_{\ell, m_A+1}(t) \lambda_\ell(t) \sum_{q=0}^{p-1} \binom{p}{q} \mathbf{E}_{j,\ell}^q(t)
\end{aligned}$$

$$\begin{aligned}
& +\alpha_k(t) \sum_{\ell=1}^{m_A} a_{\ell, m_A+1}(t) \lambda_\ell(t) E_{j,\ell}^p(t) \\
& + \sum_{\ell=1}^{m_A} a_{\ell k}(t) \lambda_\ell(t) E_{j,\ell}^p(t) \\
& + \sum_{\substack{\ell=1 \\ \ell \neq j}}^{m_B} b_{\ell, m_B+1}(t) \mu_\ell(t) E_{j\ell, k}^p(t) \\
& + \mu_j(t) [1 - b_{jj}(t)] \sum_{q=0}^{p-1} \binom{p}{q} E_{j,k}^{q+1}(t) (-1)^{p-q} \\
& + \sum_{\substack{h=1 \\ h \neq j}}^{m_B} [1 - b_{hh}(t) - b_{h, m_B+1}(t) - b_{hj}(t)] \mu_h(t) E_{jh, k}^p(t) \\
& + \sum_{\substack{h=1 \\ h \neq j}}^{m_B} b_{hj}(t) \mu_h(t) \sum_{q=0}^p \binom{p}{q} E_{jh, k}^q(t) \\
= & -\lambda_k(t) E_{j,k}^p(t) \\
& - \sum_{\substack{\ell=1 \\ \ell \neq j}}^{m_B} \mu_\ell(t) [1 - b_{\ell\ell}(t)] E_{j\ell, k}^p(t) \\
& + \alpha_k(t) \beta_j(t) \sum_{\ell=1}^{m_A} a_{\ell, m_A+1}(t) \lambda_\ell(t) \sum_{q=0}^{p-1} \binom{p}{q} E_{j,\ell}^q(t) \\
& + \alpha_k(t) \sum_{\ell=1}^{m_A} a_{\ell, m_A+1}(t) \lambda_\ell(t) E_{j,\ell}^p(t) \\
& + \sum_{\ell=1}^{m_A} a_{\ell k}(t) \lambda_\ell(t) E_{j,\ell}^p(t) \\
& + \sum_{\substack{\ell=1 \\ \ell \neq j}}^{m_B} b_{\ell, m_B+1}(t) \mu_\ell(t) E_{j\ell, k}^p(t) \\
& + \mu_j(t) [1 - b_{jj}(t)] \sum_{q=0}^{p-1} \binom{p}{q} E_{j,k}^{q+1}(t) (-1)^{p-q} \\
& + \sum_{\substack{\ell=1 \\ \ell \neq j}}^{m_B} \mu_\ell(t) [1 - b_{\ell\ell}(t)] E_{j\ell, k}^p(t)
\end{aligned}$$

$$\begin{aligned}
& - \sum_{\substack{\ell=1 \\ \ell \neq j}}^{m_B} \mu_\ell(t) b_{\ell, m_B+1}(t) E_{j, \ell, k}^p(t) \\
& - \sum_{\substack{\ell=1 \\ \ell \neq j}}^{m_B} \mu_\ell(t) b_{\ell j}(t) E_{j, \ell, k}^p(t) \\
& + \sum_{\substack{h=1 \\ h \neq j}}^{m_B} b_{hj}(t) \mu_h(t) \sum_{q=0}^p \binom{p}{q} E_{jh, k}^q(t) \\
= & - \lambda_k(t) E_{j, k}^p(t) \\
& + \alpha_k(t) \beta_j(t) \sum_{\ell=1}^{m_A} a_{\ell, m_A+1}(t) \lambda_\ell(t) \sum_{q=0}^{p-1} \binom{p}{q} E_{j, \ell}^q(t) \\
& + \alpha_k(t) \sum_{\ell=1}^{m_A} a_{\ell, m_A+1}(t) \lambda_\ell(t) E_{j, \ell}^p(t) \\
& + \sum_{\ell=1}^{m_A} a_{\ell k}(t) \lambda_\ell(t) E_{j, \ell}^p(t) \\
& + \mu_j(t) [1 - b_{jj}(t)] \sum_{q=0}^{p-1} \binom{p}{q} E_{j, k}^{q+1}(t) (-1)^{p-q} \\
& + \sum_{\substack{\ell=1 \\ \ell \neq j}}^{m_B} b_{\ell j}(t) \mu_\ell(t) \sum_{q=0}^{p-1} \binom{p}{q} E_{jh, k}^q(t)
\end{aligned}$$

□



**Theorem 5** *The  $Ph_t/Ph_t/\infty$  cross-product partial-moment differential equations are*

$$\begin{aligned}
E_{ij,k}(t)' &= \sum_{\ell=1}^{m_B} b_{\ell i}(t) \mu_{\ell} E_{\ell j,k}(t) + \sum_{\ell=1}^{m_B} b_{\ell j}(t) \mu_{\ell} E_{\ell i,k}(t) \\
&\quad - b_{ij}(t) \mu_i(t) E_{i,k}(t) - b_{ji}(t) \mu_j(t) E_{j,k}(t) \\
&\quad - [\mu_i(t) + \mu_j(t)] E_{ij,k}(t) - \lambda_k(t) E_{ij,k}(t) \\
&\quad + \sum_{\ell=1}^{m_A} \lambda_{\ell}(t) a_{\ell k}(t) E_{ij,\ell}(t) + \alpha_k(t) \sum_{\ell=1}^{m_A} \lambda_{\ell}(t) a_{\ell, m_A+1}(t) E_{ij,\ell}(t) \\
&\quad + \beta_i(t) \alpha_k(t) \sum_{\ell=1}^{m_A} \lambda_{\ell}(t) a_{\ell, m_A+1}(t) E_{j,\ell}(t) + \beta_j(t) \alpha_k(t) \sum_{\ell=1}^{m_A} \lambda_{\ell}(t) a_{\ell, m_A+1}(t) E_{i,\ell}(t).
\end{aligned}$$

$i = 1, 2, \dots, m_B$  and  $j = 1, 2, \dots, m_B$ ,  $i \neq j$ , and  $k = 1, 2, \dots, m_A$ .

**Proof:**

$$\begin{aligned}
E_{ij,k}(t)' &\equiv \sum_{n_1=0}^{\infty} \sum_{n_2=0}^{\infty} \cdots \sum_{n_j=0}^{\infty} \cdots \sum_{n_{m_B}=0}^{\infty} n_i n_j P(t; n_1, n_2, \dots, n_{m_B}, k)' \\
&= \sum_{n_1=0}^{\infty} \sum_{n_2=0}^{\infty} \cdots \sum_{n_j=0}^{\infty} \cdots \sum_{n_{m_B}=0}^{\infty} n_i n_j \times \\
&\quad \left\{ \begin{aligned}
&- [1 - a_{kk}(t)] \lambda_k(t) P(t; n_1, n_2, \dots, n_{m_B}, k) \\
&- \sum_{\ell=1}^{m_B} n_{\ell} \mu_{\ell}(t) [1 - b_{\ell\ell}(t)] P(t; n_1, n_2, \dots, n_{m_B}, k) \\
&+ \sum_{\ell=1}^{m_A} a_{\ell, m_A+1}(t) \alpha_k(t) \lambda_{\ell}(t) \sum_{h=1}^{m_B} I_{[n_h > 0]} \beta_h(t) P(t; n_1, \dots, n_h - 1, \dots, n_{m_B}, \ell) \\
&+ \sum_{\substack{\ell=1 \\ \ell \neq k \\ m_B}}^{m_A} a_{\ell k}(t) \lambda_{\ell}(t) P(t; n_1, n_2, \dots, n_{m_B}, \ell) \\
&+ \sum_{\substack{\ell=1 \\ m_B}}^{m_B} b_{\ell, m_B+1}(t) [n_{\ell} + 1] \mu_{\ell}(t) P(t; n_1, \dots, n_{\ell} + 1, \dots, n_{m_B}, k) \\
&+ \sum_{\ell=1}^{m_B} I_{[n_{\ell} > 0]} \sum_{\substack{h=1 \\ h \neq \ell}}^{m_B} b_{h\ell}(t) [n_h + 1] \mu_h(t) P(t; n_1, \dots, n_{\ell} - 1, \dots, n_h + 1, \dots, n_{m_B}, k)
\end{aligned} \right\} \\
&= -[1 - a_{kk}(t)] \lambda_k(t) E_{ij,k}(t) \\
&\quad - \sum_{\substack{\ell=1 \\ \ell \neq i \\ \ell \neq j}}^{m_B} \mu_{\ell}(t) [1 - b_{\ell\ell}(t)] E_{ij,\ell,k}(t) \\
&\quad - \mu_i(t) [1 - b_{ii}(t)] E_{ij,k}^2(t) - \mu_j(t) [1 - b_{jj}(t)] E_{ji,k}^2(t)
\end{aligned}$$

$$\begin{aligned}
& + \alpha_k(t) \sum_{\ell=1}^{m_A} a_{\ell, m_A+1}(t) \lambda_\ell(t) \left\{ \sum_{\substack{h=1 \\ h \neq i \\ h \neq j}}^{m_B} \beta_h(t) E_{ij, \ell}(t) \right. \\
& \quad \left. + \beta_i(t) \sum_{n_i=0}^{\infty} [n_i + 1] n_j P(t; n_i, n_j, \ell) + \beta_j(t) \sum_{n_j=0}^{\infty} n_i [n_j + 1] P(t; n_i, n_j, \ell) \right\} \\
& + \sum_{\substack{\ell=1 \\ \ell \neq i \\ \ell \neq j}}^{m_B} b_{\ell, m_B+1}(t) \mu_\ell(t) \sum_{n_\ell=0}^{\infty} \sum_{n_i=0}^{\infty} \sum_{n_j=0}^{\infty} n_i n_j [n_\ell + 1] P(t; n_\ell + 1, n_i, n_j, k) \\
& \quad + b_{i, m_B+1}(t) \mu_i(t) \sum_{n_i=0}^{\infty} \sum_{n_j=0}^{\infty} n_i n_j [n_i + 1] P(t; n_i + 1, n_j, k) \\
& \quad + b_{j, m_B+1}(t) \mu_j(t) \sum_{n_i=0}^{\infty} \sum_{n_j=0}^{\infty} n_i n_j [n_j + 1] P(t; n_i, n_j + 1, k) \\
& + \sum_{\substack{\ell=1 \\ \ell \neq i \\ \ell \neq j}}^{m_B} \left\{ \sum_{\substack{h=1 \\ h \neq \ell \\ h \neq i \\ h \neq j}}^{m_B} b_{h\ell}(t) \mu_h(t) \sum_{n_\ell=1}^{\infty} \sum_{n_h=0}^{\infty} \sum_{n_i=0}^{\infty} \sum_{n_j=0}^{\infty} n_i n_j (n_h + 1) P(t; n_\ell - 1, n_i, n_j, n_h + 1, k) \right. \\
& \quad + \mu_i(t) b_{i\ell}(t) \sum_{n_\ell=1}^{\infty} \sum_{n_i=0}^{\infty} \sum_{n_j=0}^{\infty} n_i n_j [n_i + 1] P(t; n_\ell - 1, n_i + 1, n_j, k) \\
& \quad \left. + \mu_j(t) b_{j\ell}(t) \sum_{n_\ell=1}^{\infty} \sum_{n_i=0}^{\infty} \sum_{n_j=0}^{\infty} n_i n_j [n_j + 1] P(t; n_\ell - 1, n_i, n_j + 1, k) \right\} \\
& + \sum_{\substack{h=1 \\ h \neq i \\ h \neq j}}^{m_B} b_{hi}(t) \mu_h(t) \sum_{n_h=0}^{\infty} \sum_{n_i=1}^{\infty} \sum_{n_j=0}^{\infty} n_i n_j [n_h + 1] P(t; n_i - 1, n_j, n_h + 1, k) \\
& + \sum_{\substack{h=1 \\ h \neq i \\ h \neq j}}^{m_B} b_{hj}(t) \mu_h(t) \sum_{n_h=0}^{\infty} \sum_{n_i=0}^{\infty} \sum_{n_j=1}^{\infty} n_i n_j [n_h + 1] P(t; n_i, n_j - 1, n_h + 1, k) \\
& + b_{ji}(t) \mu_j(t) \sum_{n_j=0}^{\infty} \sum_{n_i=1}^{\infty} n_i n_j [n_j + 1] P(t; n_i - 1, n_j + 1, k) \\
& + b_{ij}(t) \mu_i(t) \sum_{n_j=1}^{\infty} \sum_{n_i=0}^{\infty} n_i n_j [n_i + 1] P(t; n_j - 1, n_i + 1, k) \\
& + \sum_{\substack{\ell=1 \\ \ell \neq k}}^{m_A} a_{\ell k}(t) \lambda_\ell(t) E_{ij, \ell}(t)
\end{aligned}$$

$$\begin{aligned}
&= -[1 - a_{kk}(t)]\lambda_k(t)\mathbb{E}_{ij,k}(t) \\
&\quad - \sum_{\substack{\ell=1 \\ \ell \neq i \\ \ell \neq j}}^{m_B} \mu_\ell(t)[1 - b_{\ell\ell}(t)]\mathbb{E}_{ij\ell,k}(t) \\
&\quad - \mu_i(t)[1 - b_{ii}(t)]\mathbb{E}_{ij,k}^2(t) - \mu_j(t)[1 - b_{jj}(t)]\mathbb{E}_{ji,k}^2(t) \\
&\quad + \alpha_k(t) \sum_{\ell=1}^{m_A} a_{\ell,m_A+1}(t)\lambda_\ell(t) \left\{ [1 - \beta_i(t) - \beta_j(t)]\mathbb{E}_{ij,\ell}(t) \right. \\
&\quad \quad \left. + \beta_i(t)[\mathbb{E}_{ij,\ell}(t) + \mathbb{E}_{j,\ell}(t)] + \beta_j(t)[\mathbb{E}_{ij,\ell}(t) + \mathbb{E}_{i,\ell}(t)] \right\} \\
&\quad + \sum_{\substack{\ell=1 \\ \ell \neq i \\ \ell \neq j}}^{m_B} b_{\ell,m_B+1}(t)\mu_\ell(t)\mathbb{E}_{ij\ell,k}(t) \\
&\quad + b_{i,m_B+1}(t)\mu_i(t) \sum_{n_i=1}^{\infty} \sum_{n_j=0}^{\infty} [n_i - 1]n_j n_i \mathbb{P}(t; n_i, n_j, k) \\
&\quad + b_{j,m_B+1}(t)\mu_j(t) \sum_{n_i=0}^{\infty} \sum_{n_j=1}^{\infty} n_i[n_j - 1]n_j \mathbb{P}(t; n_i, n_j, k) \\
&\quad + \sum_{\substack{\ell=1 \\ \ell \neq i \\ \ell \neq j}}^{m_B} \left\{ \sum_{\substack{h=1 \\ h \neq \ell \\ h \neq i \\ h \neq j}}^{m_B} b_{h\ell}(t)\mu_h(t) \sum_{n_\ell=0}^{\infty} \sum_{n_h=1}^{\infty} \sum_{n_i=0}^{\infty} \sum_{n_j=0}^{\infty} n_i n_j n_h \mathbb{P}(t; n_\ell, n_i, n_j, n_h, k) \right. \\
&\quad \quad + \mu_i(t)b_{i\ell}(t) \sum_{n_\ell=0}^{\infty} \sum_{n_i=1}^{\infty} \sum_{n_j=0}^{\infty} [n_i - 1]n_j n_i \mathbb{P}(t; n_\ell, n_i, n_j, k) \\
&\quad \quad \left. + \mu_j(t)b_{j\ell}(t) \sum_{n_\ell=0}^{\infty} \sum_{n_i=0}^{\infty} \sum_{n_j=1}^{\infty} n_i[n_j - 1]n_j \mathbb{P}(t; n_\ell, n_i, n_j, k) \right\} \\
&\quad + \sum_{\substack{h=1 \\ h \neq i \\ h \neq j}}^{m_B} b_{hi}(t)\mu_h(t) \sum_{n_h=1}^{\infty} \sum_{n_i=0}^{\infty} \sum_{n_j=0}^{\infty} [n_i + 1]n_j n_h \mathbb{P}(t; n_i, n_j, n_h, k) \\
&\quad + \sum_{\substack{h=1 \\ h \neq i \\ h \neq j}}^{m_B} b_{hj}(t)\mu_h(t) \sum_{n_h=1}^{\infty} \sum_{n_i=0}^{\infty} \sum_{n_j=0}^{\infty} n_i[n_j + 1]n_h \mathbb{P}(t; n_i, n_j, n_h, k) \\
&\quad + b_{ji}(t)\mu_j(t) \sum_{n_j=1}^{\infty} \sum_{n_i=0}^{\infty} [n_i + 1][n_j - 1]n_j \mathbb{P}(t; n_i, n_j, k)
\end{aligned}$$

$$\begin{aligned}
& + b_{ij}(t)\mu_i(t) \sum_{n_j=0}^{\infty} \sum_{n_i=1}^{\infty} [n_i - 1][n_j + 1]n_i P(t; n_j, n_i, k) \\
& + \sum_{\substack{\ell=1 \\ \ell \neq k}}^{m_A} a_{\ell k}(t)\lambda_{\ell}(t)E_{ij,\ell}(t) \\
= & -\lambda_k(t)E_{ij,k}(t) \\
& - \sum_{\substack{\ell=1 \\ \ell \neq i \\ \ell \neq j}}^{m_B} \mu_{\ell}(t)[1 - b_{\ell\ell}(t)]E_{ij\ell,k}(t) \\
& - \mu_i(t)[1 - b_{ii}(t)]E_{ij,k}^2(t) - \mu_j(t)[1 - b_{jj}(t)]E_{ji,k}^2(t) \\
& + \alpha_k(t) \sum_{\ell=1}^{m_A} a_{\ell, m_A+1}(t)\lambda_{\ell}(t) \left\{ E_{ij,\ell}(t) + \beta_i(t)E_{j,\ell}(t) + \beta_j(t)E_{i,\ell}(t) \right\} \\
& + b_{i, m_B+1}(t)\mu_i(t) \left[ E_{ij,k}^2(t) - E_{ij,k}(t) \right] + b_{j, m_B+1}(t)\mu_j(t) \left[ E_{ji,k}^2(t) - E_{ij,k}(t) \right] \\
& + \sum_{\substack{\ell=1 \\ \ell \neq i \\ \ell \neq j}}^{m_B} b_{\ell, m_B+1}(t)\mu_{\ell}(t)E_{ij\ell,k}(t) \\
& + \sum_{\substack{\ell=1 \\ \ell \neq i \\ \ell \neq j}}^{m_B} \left\{ \sum_{\substack{h=1 \\ h \neq \ell \\ h \neq i \\ h \neq j}}^{m_B} b_{h\ell}(t)\mu_h(t)E_{ijh,k}(t) \right. \\
& \quad \left. + \mu_i(t)b_{i\ell}(t) \left[ E_{ij,k}^2(t) - E_{ij,k}(t) \right] + \mu_j(t)b_{j\ell}(t) \left[ E_{ji,k}^2(t) - E_{ij,k}(t) \right] \right\} \\
& + \sum_{\substack{h=1 \\ h \neq i \\ h \neq j}}^{m_B} b_{hi}(t)\mu_h(t) \left[ E_{ijh,k}(t) + E_{jh,k}(t) \right] + \sum_{\substack{h=1 \\ h \neq i \\ h \neq j}}^{m_B} b_{hj}(t)\mu_h(t) \left[ E_{ijh,k}(t) + E_{ih,k}(t) \right] \\
& + \sum_{\ell=1}^{m_A} a_{\ell k}(t)\lambda_{\ell}(t)E_{ij,\ell}(t) \\
& + b_{ji}(t)\mu_j(t) \left[ E_{ji,k}^2(t) - E_{ij,k}(t) + E_{j,k}^2(t) - E_{j,k}(t) \right] \\
& + b_{ij}(t)\mu_i(t) \left[ E_{ij,k}^2(t) - E_{ij,k}(t) + E_{i,k}^2(t) - E_{i,k}(t) \right] \\
= & -\lambda_k(t)E_{ij,k}(t)
\end{aligned}$$

$$\begin{aligned}
& - \sum_{\substack{\ell=1 \\ \ell \neq i \\ \ell \neq j}}^{m_B} \mu_\ell(t) E_{ij\ell,k}(t) + \sum_{\substack{\ell=1 \\ \ell \neq i \\ \ell \neq j}}^{m_B} \mu_\ell(t) b_{\ell\ell}(t) E_{ij\ell,k}(t) + \sum_{\substack{\ell=1 \\ \ell \neq i \\ \ell \neq j}}^{m_B} \mu_\ell(t) b_{\ell, m_B+1}(t) E_{ij\ell,k}(t) \\
& - \mu_i(t) [1 - b_{ii}(t)] E_{ij,k}^2(t) - \mu_j(t) [1 - b_{jj}(t)] E_{ji,k}^2(t) \\
& + \alpha_k(t) \sum_{\ell=1}^{m_A} \left\{ a_{\ell, m_A+1}(t) \lambda_\ell(t) E_{ij,\ell}(t) + \beta_i(t) E_{j,\ell}(t) + \beta_j(t) E_{i,\ell}(t) \right\} \\
& + b_{i, m_B+1}(t) \mu_i(t) [E_{ij,k}^2(t) - E_{ij,k}(t)] + b_{j, m_B+1}(t) \mu_j(t) [E_{ji,k}^2(t) - E_{ij,k}(t)] \\
& + \sum_{\substack{\ell=1 \\ \ell \neq i \\ \ell \neq j}}^{m_B} \sum_{\substack{h=1 \\ h \neq \ell \\ h \neq i \\ h \neq j}}^{m_B} b_{h\ell}(t) \mu_h(t) E_{ijh,k}(t) \\
& + \mu_i(t) \sum_{\substack{\ell=1 \\ \ell \neq i \\ \ell \neq j}}^{m_B} b_{i\ell}(t) [E_{ij,k}^2(t) - E_{ij,k}(t)] + \mu_j(t) \sum_{\substack{\ell=1 \\ \ell \neq i \\ \ell \neq j}}^{m_B} b_{j\ell}(t) [E_{ji,k}^2(t) - E_{ij,k}(t)] \\
& + \sum_{\substack{h=1 \\ h \neq i \\ h \neq j}}^{m_B} b_{hi}(t) \mu_h(t) [E_{ijh,k}(t) + E_{jh,k}(t)] + \sum_{\substack{h=1 \\ h \neq i \\ h \neq j}}^{m_B} b_{hj}(t) \mu_h(t) [E_{ijh,k}(t) + E_{ih,k}(t)] \\
& + b_{ji}(t) \mu_j(t) [E_{ji,k}^2(t) - E_{ij,k}(t) + E_{j,k}^2(t) - E_{j,k}(t)] \\
& + b_{ij}(t) \mu_i(t) [E_{ij,k}^2(t) - E_{ij,k}(t) + E_{i,k}^2(t) - E_{i,k}(t)] \\
& + \sum_{\ell=1}^{m_A} a_{\ell k}(t) \lambda_\ell(t) E_{ij,\ell}(t) \\
= & - \lambda_k(t) E_{ij,k}(t) \\
& - \sum_{\substack{\ell=1 \\ \ell \neq i \\ \ell \neq j}}^{m_B} \mu_\ell(t) E_{ij\ell,k}(t) + \sum_{\substack{\ell=1 \\ \ell \neq i \\ \ell \neq j}}^{m_B} \mu_\ell(t) b_{\ell\ell}(t) E_{ij\ell,k}(t) + \sum_{\ell=1}^{m_B} \mu_\ell(t) b_{\ell, m_B+1}(t) E_{ij\ell,k}(t) \\
& - \mu_i(t) E_{ij,k}^2(t) - \mu_j(t) E_{ji,k}^2(t) \\
& + \alpha_k(t) \sum_{\ell=1}^{m_A} \left\{ a_{\ell, m_A+1}(t) \lambda_\ell(t) E_{ij,\ell}(t) + \beta_i(t) E_{j,\ell}(t) + \beta_j(t) E_{i,\ell}(t) \right\} \\
& - b_{i, m_B+1}(t) \mu_i(t) E_{ij,k}(t) - b_{j, m_B+1}(t) \mu_j(t) E_{ij,k}(t)
\end{aligned}$$

$$\begin{aligned}
& + \sum_{\substack{\ell=1 \\ \ell \neq i \\ \ell \neq j}}^{m_B} \sum_{\substack{h=1 \\ h \neq \ell \\ h \neq i \\ h \neq j}}^{m_B} b_{h\ell}(t) \mu_h(t) E_{ijh,k}(t) \\
& + \mu_i(t) \left\{ \sum_{\substack{\ell=1 \\ \ell \neq i}}^{m_B} b_{i\ell}(t) \right\} [E_{ij,k}^2(t) - E_{ij,k}(t)] \\
& + \mu_j(t) \left\{ \sum_{\substack{\ell=1 \\ \ell \neq j}}^{m_B} b_{j\ell}(t) \right\} [E_{ji,k}^2(t) - E_{ij,k}(t)] \\
& + \sum_{\substack{h=1 \\ h \neq i}}^{m_B} b_{hi}(t) \mu_h(t) [E_{ijh,k}(t) + E_{jh,k}(t)] - b_{ji}(t) \mu_j(t) E_{ji,k}^2(t) \\
& + \sum_{\substack{h=1 \\ h \neq j}}^{m_B} b_{hj}(t) \mu_h(t) [E_{ijh,k}(t) + E_{ih,k}(t)] - b_{ij}(t) \mu_i(t) E_{ij,k}^2(t) \\
& - b_{ji}(t) \mu_j(t) E_{j,k}(t) - b_{ij}(t) \mu_i(t) E_{i,k}(t) \\
& + \sum_{\ell=1}^{m_A} a_{\ell k}(t) \lambda_\ell(t) E_{ij,\ell}(t) \\
= & - \lambda_k(t) E_{ij,k}(t) \\
& - \sum_{\substack{\ell=1 \\ \ell \neq i \\ \ell \neq j}}^{m_B} \mu_\ell(t) E_{ij\ell,k}(t) + \sum_{\ell=1}^{m_B} \mu_\ell(t) b_{\ell m_B+1}(t) E_{ij\ell,k}(t) \\
& - \mu_i(t) E_{ij,k}^2(t) - \mu_j(t) E_{ji,k}^2(t) \\
& + \alpha_k(t) \sum_{\ell=1}^{m_A} \left\{ a_{\ell, m_A+1}(t) \lambda_\ell(t) E_{ij,\ell}(t) + \beta_i(t) E_{j,\ell}(t) + \beta_j(t) E_{i,\ell}(t) \right\} \\
& - b_{i, m_B+1}(t) \mu_i(t) E_{ij,k}(t) - b_{j, m_B+1}(t) \mu_j(t) E_{ij,k}(t) \\
& + \sum_{\substack{h=1 \\ h \neq i \\ h \neq j}}^{m_B} \mu_h(t) E_{ijh,k}(t) - \sum_{\substack{h=1 \\ h \neq i \\ h \neq j}}^{m_B} b_{hi}(t) \mu_h(t) E_{ijh,k}(t) - \sum_{\substack{h=1 \\ h \neq i \\ h \neq j}}^{m_B} b_{hj}(t) \mu_h(t) E_{ijh,k}(t) \\
& - \sum_{\substack{h=1 \\ h \neq i \\ h \neq j}}^{m_B} b_{h, m_B+1}(t) \mu_h(t) E_{ijh,k}(t) \\
& + \mu_i(t) (E_{ij,k}^2(t) - E_{ij,k}(t)) (1 - b_{i, m_B+1}(t))
\end{aligned}$$

$$\begin{aligned}
& +\mu_j(t)\left(E_{ji,k}^2(t) - E_{ij,k}(t)\right)\left(1 - b_{j,m_B+1}(t)\right) \\
& + \sum_{h=1}^{m_B} b_{hi}(t)\mu_h(t)\left[E_{ijh,k}(t) + E_{jh,k}(t)\right] + \sum_{h=1}^{m_B} b_{hj}(t)\mu_h(t)\left[E_{ijh,k}(t) + E_{ih,k}(t)\right] \\
& - b_{ji}(t)\mu_j(t)E_{ji,k}^2(t) - b_{ij}(t)\mu_i(t)E_{ij,k}^2(t) \\
& - b_{ji}(t)\mu_j(t)E_{j,k}(t) - b_{ij}(t)\mu_i(t)E_{i,k}(t) \\
& - \mu_i(t)b_{ii}(t)E_{ij,k}^2(t) - \mu_j(t)b_{jj}(t)E_{ji,k}^2(t) \\
& + \sum_{\ell=1}^{m_A} a_{\ell k}(t)\lambda_\ell(t)E_{ij,\ell}(t) \\
= & -\lambda_k(t)E_{ij,k}(t) \\
& + \sum_{\ell=1}^{m_B} \mu_\ell(t)b_{\ell,m_B+1}(t)E_{ij\ell,k}(t) \\
& + \alpha_k(t)\sum_{\ell=1}^{m_A} \left\{ a_{\ell,m_A+1}(t)\lambda_\ell(t)E_{ij,\ell}(t) + \beta_i(t)E_{j,\ell}(t) + \beta_j(t)E_{i,\ell}(t) \right\} \\
& - \mu_i(t)E_{ij,k}(t) - \mu_i(t)b_{i,m_B+1}(t)E_{ij,k}^2(t) - \mu_j(t)E_{ij,k}(t) - \mu_j(t)b_{j,m_B+1}(t)E_{ji,k}^2(t) \\
& - \sum_{\substack{h=1 \\ h \neq i \\ h \neq j}}^{m_B} b_{h,m_B+1}(t)\mu_h(t)E_{ijh,k}(t) \\
& + \sum_{h=1}^{m_B} b_{hi}(t)\mu_h(t)E_{jh,k}(t) + \sum_{h=1}^{m_B} b_{hj}(t)\mu_h(t)E_{ih,k}(t) \\
& - b_{ji}(t)\mu_j(t)E_{ij,k}(t) - b_{ij}(t)\mu_i(t)E_{ij,k}(t) \\
& + \sum_{\ell=1}^{m_A} a_{\ell k}(t)\lambda_\ell(t)E_{ij,\ell}(t) \\
= & \sum_{h=1}^{m_B} b_{hi}(t)\mu_h(t)E_{jh,k}(t) + \sum_{h=1}^{m_B} b_{hj}(t)\mu_h(t)E_{ih,k}(t) \\
& - b_{ij}(t)\mu_i(t)E_{i,k}(t) - b_{ji}(t)\mu_j(t)E_{j,k}(t) \\
& - \left[\mu_i(t) + \mu_j(t)\right]E_{ij,k}(t) \\
& + \alpha_k(t)\sum_{\ell=1}^{m_A} \left\{ a_{\ell,m_A+1}(t)\lambda_\ell(t)E_{ij,\ell}(t) + \beta_i(t)E_{j,\ell}(t) + \beta_j(t)E_{i,\ell}(t) \right\}
\end{aligned}$$

$$-\lambda_k(t)E_{ij,k}(t) + \sum_{\ell=1}^{m_A} a_{\ell k}(t)\lambda_{\ell}(t)E_{ij,\ell}(t)$$

□
